# Supplementary material for: Detection of epistasis interaction loci for fiber quality-related trait via 3VmrMLM in upland cotton
Source: Front Plant Sci. 2023 Sep 28;14:1250161. doi: 10.3389/fpls.2023.1250161 (PMC10568130; doi:10.3389/fpls.2023.1250161)
Supplement: Supplementary file 3 [file Table_2.xlsx]

## Sheet: Sheet1
Supplementary Table 2 The QQIs for fiber quality-related traits.
Trait	QTN_1	Chromosome_1	Position_1 (bp)	Start (bp)	End (bp)	QTN_2	Chromsome_2	Position_2 (bp)	Start (bp)	End (bp)	LOD	PVE (%)	P-value	Type	Gene_1#	References	Gene_2#	References
FL	epiFL-A02-1	A02	161178	56304	176577	epiFL-A05-1	A05	1025103	984572	1132479	4.2585	1.1102	0.000596115	AA
	epiFL-A04-1	A04	48554477	48550644	48591806	epiFL-A08-1	A08	31754811	31662375	31862367	3.0518	0.2726	0.00712552	AA
	epiFL-A05-2	A05	5682622	5672325	5687637	epiFL-D09-1	D09	5096223	4935546	5135540	3.8988	0.6301	0.00125983	AD
	epiFL-A09-1	A09	77814014	77810631	77851433	epiFL-A10-1	A10	13480411	12819189	13480411	3.1439	5.6949	0.00591665	AA			Gh_A10G071000	Geng et al.(2020)
	epiFL-A10-1	A10	13480411	12819189	13480411	epiFL-D03-1	D03	378922	277830	378922	4.4081	1.0528	0.000435852	AD	Gh_A10G071000	Geng et al.(2020)
	epiFL-A10-2	A10	111356427	111346008	111356614	epiFL-D12-1	D12	58183426	58059051	58253637	3.6942	0.5068	0.0019229	AD		He et al. (2021)
	epiFL-A11-1	A11	115361620	115350850	115422315	epiFL-D03-2	D03	2555685	2555685	2556461	3.3664	0.2953	0.00376541	AD
	epiFL-D06-1	D06	4166176	4153507	4226429	epiFL-D06-2	D06	4179009	4153507	4226429	3.5231	0.9904	0.00273322	DD
FS	epiFS-A04-1	A04	6079915	6039200	6124488	epiFS-D13-1	D13	1935015	1908629	1952354	3.7946	1.5434	0.00156317	AD
	epiFS-A04-2	A04	77171255	77125917	77262839	epiFS-D07-3	D07	42476906	42369408	42569318	5.7731	2.5554	2.41102e-05	AD
	epiFS-A05-1	A05	22375825	22179154	22379099	epiFS-A07-1	A07	17653715	17524497	17718761	4.7955	0.5401	0.000192899	AA
	epiFS-A08-1	A08	23106306	22933783	23133783	epiFS-A08-3	A08	31554661	31441142	31641140	4.7866	5.5523	0.000196558	AA
	epiFS-A08-2	A08	25927381	25746444	25946440	epiFS-A08-4	A08	72822991	72643117	72843117	6.7863	2.0589	2.72096e-06	AA
	epiFS-A08-5	A08	111030143	110982602	111053305	epiFS-D10-1	D10	62450484	62434438	62497140	3.3172	1.8779	0.0041623	AD
	epiFS-A09-1	A09	1406341	1378129	1407576	epiFS-A09-6	A09	79606758	79518729	79606758	3.946	2.773	0.00114253	AA
	epiFS-A09-2	A09	61235738	61235738	61351444	epiFS-D05-1	D05	52213369	52207783	52451869	4.4619	0.2298	0.000389369	AD
	epiFS-A09-3	A09	61429015	61428643	61442787	epiFS-A11-1	A11	72500948	72500948	72523288	3.3901	0.7725	0.00358733	AA
	epiFS-A09-4	A09	61531557	61467142	61545913	epiFS-D07-2	D07	41487983	41484448	41684441	3.9719	3.7778	0.00108264	AD
	epiFS-A09-5	A09	61759908	61748775	61801505	epiFS-A11-2	A11	77324419	77305398	77505398	3.869	0.4397	0.00134019	AA		Geng et al.(2020); Song et al. (2021)
	epiFS-D01-1	D01	44446941	44413960	44613949	epiFS-D01-2	D01	44526524	44413960	44613949	4.9758	0.8563	0.000131752	DD
	epiFS-D07-1	D07	2089762	2078102	2089762	epiFS-D09-1	D09	50463673	50375022	50474176	3.6331	2.373	0.00218055	DD
FE	epiFE-A01-1	A01	11746972	11741364	11746972	epiFE-D02-1	D02	911647	910282	1025136	3.5877	0.6295	0.00239355	AD				Huang et al.(2017); Song et al. (2021); Ma et al. (2018)
	epiFE-A02-1	A02	101002877	100968226	101061171	epiFE-A12-3	A12	102677250	102676125	102679374	5.3182	0.4019	6.36903e-05	AA		Li et al. (2018); Song et al. (2021)
	epiFE-A05-1	A05	9995639	9959537	10007497	epiFE-D03-1	D03	2892564	2834097	2934173	3.0412	0.7803	0.00728066	AD	Gh_A05G094100	He et al. (2021)
	epiFE-A05-2	A05	10502078	10384139	10584128	epiFE-D13-2	D13	5019567	5018372	5021760	3.0868	0.6984	0.0066401	AD		Huang et al.(2017); Li et al.(2018); Nazir et al. (2020)
	epiFE-A05-3	A05	23699241	23674186	23699241	epiFE-D04-3	D04	51418498	51250504	51434878	3.9471	0.7222	0.00113979	AD		Li et al. (2018); Song et al. (2021)
	epiFE-A05-4	A05	23704959	23704274	23706633	epiFE-A08-2	A08	68484251	68453168	68653168	5.3431	1.0654	6.04031e-05	AA		Li et al. (2018); Song et al. (2021)
	epiFE-A05-5	A05	51399299	51363284	51591672	epiFE-D07-1	D07	27619443	27566769	27766761	3.589	0.3721	0.000257734	AD
	epiFE-A05-6	A05	94562331	94405273	94590147	epiFE-D04-5	D04	51927145	51897090	52062130	4.7663	0.7181	0.000205186	AD
	epiFE-A06-1	A06	34388517	34355454	34390114	epiFE-A09-1	A09	69963530	69784007	69984006	3.7473	0.3888	0.00172344	AA
	epiFE-A07-1	A07	42472572	42453496	42653493	epiFE-A12-1	A12	98605178	98594160	98629401	4.426	0.7901	0.000419766	AA
	epiFE-A07-2	A07	89882612	89774718	89974718	epiFE-D08-2	D08	4292304	4279412	4292304	3.7941	0.3586	0.0015648	AD
	epiFE-A08-1	A08	11134108	11065605	11253060	epiFE-D04-1	D04	8173930	8014440	8214393	6.1484	0.5429	1.07758e-05	AD
	epiFE-A08-3	A08	113486209	113441270	113641226	epiFE-D06-1	D06	2210762	2175783	2220344	6.0807	1.8793	1.24628e-05	AD				Sun et al.(2017); Song et al.(2021)
	epiFE-A10-1	A10	112466148	112449696	112483356	epiFE-A11-2	A11	84074705	83952902	84152884	4.1585	0.5507	0.000734459	AA
	epiFE-A11-1	A11	47980891	47914384	48010516	epiFE-D07-2	D07	47702223	47502632	47702223	4.5341	0.8155	0.000334549	AD
	epiFE-A12-2	A12	102606983	102606983	102607284	epiFE-D12-2	D12	61076721	61076721	61153238	3.7305	0.9971	0.00178421	AD
	epiFE-A12-4	A12	104448140	104446786	104448178	epiFE-D11-1	D11	24596658	24582827	24735807	3.9252	2.1601	0.00119272	AD
	epiFE-D02-2	D02	69758057	69737493	69806042	epiFE-D04-2	D04	51351966	51250504	51434878	3.2837	0.6756	0.0044563	DD			Gh_D04G172600	Huang et al.(2017); Wang et al.(2017); Thyssen et al.(2019); Li et al.(2020)
	epiFE-D04-4	D04	51635984	51593613	51734408	epiFE-D05-1	D05	10091712	10089496	10174991	3.976	0.8675	0.00107343	DD
	epiFE-D04-6	D04	52433913	52433271	52433913	epiFE-D13-1	D13	4805762	4788807	4813778	5.6571	2.1654	3.09061e-05	DD	Gh_D04G181300	Thyssen et al. (2019)
	epiFE-D08-1	D08	3966472	3952017	3966472	epiFE-D12-1	D12	44788680	44719561	44791320	3.1349	0.8883	0.00602553	DD
Note: QTN is named as follows: epi + traits abbreviation + chromosome + QTN number. Bold indicates the loci detected in both main-effect QTNs and QQIs detection. # indicates the genes co-located by predecessors.
