# Supplementary material for: Detection of epistasis interaction loci for fiber quality-related trait via 3VmrMLM in upland cotton
Source: Front Plant Sci. 2023 Sep 28;14:1250161. doi: 10.3389/fpls.2023.1250161 (PMC10568130; doi:10.3389/fpls.2023.1250161)
Supplement: Supplementary file 4 [file Table_3.xlsx]

## Sheet: Table S3
Supplementary Table 3 The detailed information of germlasm used in this study.
No.	Genotype_ID	Grouping	Acc. Name	Locations	Region distribution of Chinese registered cultivars	Species	Genome
1	GH0086	G5	CCRI 9 (Zhong 399)	Henan	YER	Gossypium hirsutum	(AD)1
2	GH0087	G2	Keyi 181 (1)	Hebei		Gossypium hirsutum	(AD)1
3	GH0088	G5	Xinongkang 4-1-1	Shannxi		Gossypium hirsutum	(AD)1
4	GH0089	G4	Jiangsumian 1 (1)	Jiangsu	YZR	Gossypium hirsutum	(AD)1
5	GH0090	G4	Jiangsumian 2 (2)	Jiangsu	YZR	Gossypium hirsutum	(AD)1
6	GH0091	G4	Jiangsumian 3 (2)	Jiangsu	YZR	Gossypium hirsutum	(AD)1
7	GH0092	G4	Bomian 2 (Ganmian 4)	Jiangxi	YZR	Gossypium hirsutum	(AD)1
8	GH0093	G5	Shannong 3	Shandong	YER	Gossypium hirsutum	(AD)1
9	GH0094	G5	Zhong 521-1	Henan		Gossypium hirsutum	(AD)1
10	GH0095	G4	CCRI 8 (Zhong 758)	Henan	YER	Gossypium hirsutum	(AD)1
11	GH0096	G4	Shenmian 9	Shannxi	YER	Gossypium hirsutum	(AD)1
12	GH0097	G5	86-1 (Zhongzhi 86-1)	Beijing	YER	Gossypium hirsutum	(AD)1
13	GH0098	G5	Shanmian 5 (Shan 65-141)	Shannxi	YER	Gossypium hirsutum	(AD)1
14	GH0099	G5	Shan 3619	Shannxi	YER	Gossypium hirsutum	(AD)1
15	GH0100	G5	CCRI 17 (Zhong 117)	Henan	YER	Gossypium hirsutum	(AD)1
16	GH0101	G5	Jimian 12 (Handan 177)	Hebei	YER	Gossypium hirsutum	(AD)1
17	GH0102	G4	Macheng 96-1	Hubei		Gossypium hirsutum	(AD)1
18	GH0103	G4	Chuan 77-60	Sichuan		Gossypium hirsutum	(AD)1
19	GH0104	G2	CCRI 19 (Zhong 7886)	Henan	YER	Gossypium hirsutum	(AD)1
20	GH0105	G5	Keyuan 1 (1)	Hebei		Gossypium hirsutum	(AD)1
21	GH0106	G5	Keyuan 4 (1)	Hebei		Gossypium hirsutum	(AD)1
22	GH0107	G3	Ji 182	Hebei		Gossypium hirsutum	(AD)1
23	GH0108	G5	Zhong 5881	Henan		Gossypium hirsutum	(AD)1
24	GH0109	G5	Zhong 1276	Henan	YER	Gossypium hirsutum	(AD)1
25	GH0110	G5	CCRI 23 (Zhong 164)	Henan	YER	Gossypium hirsutum	(AD)1
26	GH0111	G5	Han 81-272	Hebei		Gossypium hirsutum	(AD)1
27	GH0112	G5	Ji 574	Hebei		Gossypium hirsutum	(AD)1
28	GH0113	G2	Taiyuan 3	Shanxi	NC	Gossypium hirsutum	(AD)1
29	GH0114	G3	Han 8901	Hebei		Gossypium hirsutum	(AD)1
30	GH0115	G5	RT-White lint (1)	Uncertain		Gossypium hirsutum	(AD)1
31	GH0116	G5	Su 7036yuanyuan	Jiangsu		Gossypium hirsutum	(AD)1
32	GH0117	G5	Su 7133yuanyuan	Jiangsu		Gossypium hirsutum	(AD)1
33	GH0118	G4	Suyuan 7235	Jiangsu		Gossypium hirsutum	(AD)1
34	GH0119	G5	Suyuan 7252	Jiangsu		Gossypium hirsutum	(AD)1
35	GH0120	G5	Zhongyuan 9111	Henan		Gossypium hirsutum	(AD)1
36	GH0121	G5	Zhongyuan 9112	Henan		Gossypium hirsutum	(AD)1
37	GH0122	G5	Zhongyuan 9113	Henan		Gossypium hirsutum	(AD)1
38	GH0123	G5	Zhongyuan 9114	Henan		Gossypium hirsutum	(AD)1
39	GH0124	G5	Zhongyuan 9115	Henan		Gossypium hirsutum	(AD)1
40	GH0125	G3	Zhongyuan 9116	Henan		Gossypium hirsutum	(AD)1
41	GH0126	G5	Zhongyuan 9117	Henan		Gossypium hirsutum	(AD)1
42	GH0127	G5	Zhongyuan 9118	Henan		Gossypium hirsutum	(AD)1
43	GH0128	G5	Zhongyuan 9119	Henan		Gossypium hirsutum	(AD)1
44	GH0129	G5	Zhongyuan 9120	Henan		Gossypium hirsutum	(AD)1
45	GH0130	G5	Zhongyuan HP1	Henan		Gossypium hirsutum	(AD)1
46	GH0131	G5	Zhongyuan HST1	Henan		Gossypium hirsutum	(AD)1
47	GH0132	G5	Zhongyuan HST2	Henan		Gossypium hirsutum	(AD)1
48	GH0133	G4	Keyuan 42-2	Hebei		Gossypium hirsutum	(AD)1
49	GH0134	G3	Jinyuan 92-955	Shanxi		Gossypium hirsutum	(AD)1
50	GH0135	G4	Huazhongyuan 91-230	Hubei		Gossypium hirsutum	(AD)1
51	GH0136	G2	Xinanyuan 90-1-15	Chongqing		Gossypium hirsutum	(AD)1
52	GH0137	G5	Xinanyuan 917079	Chongqing		Gossypium hirsutum	(AD)1
53	GH0138	G4	Huazhongyuan 92-217	Hubei		Gossypium hirsutum	(AD)1
54	GH0139	G5	Chuan 109 (1)	Sichuan	YZR	Gossypium hirsutum	(AD)1
55	GH0140	G5	Huazhong T72001(Lu)	Hubei		Gossypium hirsutum	(AD)1
56	GH0141	G4	Huazhong T73001(Le)	Hubei		Gossypium hirsutum	(AD)1
57	GH0142	G2	E88-203	Hubei		Gossypium hirsutum	(AD)1
58	GH0143	G5	Liaomian 3 (5632)	Liaoning	NC	Gossypium hirsutum	(AD)1
59	GH0144	G3	Jiyuan 12-13 (91han 13)	Hebei		Gossypium hirsutum	(AD)1
60	GH0145	G5	Jiyuan 249 (91han 11)	Hebei		Gossypium hirsutum	(AD)1
61	GH0146	G4	Ji 84-6	Hebei		Gossypium hirsutum	(AD)1
62	GH0147	G5	Ji 85-1	Hebei		Gossypium hirsutum	(AD)1
63	GH0148	G3	Ji 86-1	Hebei		Gossypium hirsutum	(AD)1
64	GH0149	G5	Ji 91-03	Hebei		Gossypium hirsutum	(AD)1
65	GH0150	G3	E Q1038	Hubei		Gossypium hirsutum	(AD)1
66	GH0151	G5	E T458	Hubei	YZR	Gossypium hirsutum	(AD)1
67	GH0152	G5	Jiyuan 23-24 (91han 10)	Hebei		Gossypium hirsutum	(AD)1
68	GH0153	G3	Ji A-1-7 (33xi)	Hebei		Gossypium hirsutum	(AD)1
69	GH0154	G3	Ji A-7-8 (33xi)	Hebei		Gossypium hirsutum	(AD)1
70	GH0155	G5	Luwu 401	Shandong	YER	Gossypium hirsutum	(AD)1
71	GH0156	G5	Shiyuan-321 (1)	Hebei	YER	Gossypium hirsutum	(AD)1
72	GH0157	G5	Shiyuan 638	Hebei		Gossypium hirsutum	(AD)1
73	GH0158	G5	Jimian 25 (Jizi 123)	Hebei	YER	Gossypium hirsutum	(AD)1
74	GH0159	G5	Jimian 20 (2)	Hebei	YER	Gossypium hirsutum	(AD)1
75	GH0160	G4	E E910	Hubei	YZR	Gossypium hirsutum	(AD)1
76	GH0161	G3	E E911	Hubei		Gossypium hirsutum	(AD)1
77	GH0162	G5	E E913	Hubei		Gossypium hirsutum	(AD)1
78	GH0163	G2	Qinyuan 91406 (Qinyuan 4)	Xinjiang	NWC	Gossypium hirsutum	(AD)1
79	GH0164	G4	Yumian 17 (Xinqi 8704) (Henan)	Henan	YER	Gossypium hirsutum	(AD)1
80	GH0165	G5	Ji 668 (1)	Hebei	YER	Gossypium hirsutum	(AD)1
81	GH0166	G5	Handan 333 (2)	Hebei	YER	Gossypium hirsutum	(AD)1
82	GH0167	G5	Yu 668	Henan	YER	Gossypium hirsutum	(AD)1
83	GH0168	G5	Qinli 514 (1)	Shannxi	YER	Gossypium hirsutum	(AD)1
84	GH0169	G3	Qinyuan 93089 (2)	Shannxi		Gossypium hirsutum	(AD)1
85	GH0170	G5	Shiyuan 345 (1)	Hebei	YER	Gossypium hirsutum	(AD)1
86	GH0171	G2	Jinmian 21 (2)	Shanxi	NC	Gossypium hirsutum	(AD)1
87	GH0172	G5	Changrong 2	Jiangsu		Gossypium hirsutum	(AD)1
88	GH0174	G3	Taiyuan 02-1	Shanxi		Gossypium hirsutum	(AD)1
89	GH0175	G5	Taiyuan 02-13	Shanxi		Gossypium hirsutum	(AD)1
90	GH0176	G5	Taiyuan 02-17	Shanxi		Gossypium hirsutum	(AD)1
91	GH0177	G5	Taiyuan 02-21	Shanxi		Gossypium hirsutum	(AD)1
92	GH0178	G2	Taiyuan 02-22	Shanxi		Gossypium hirsutum	(AD)1
93	GH0179	G5	Taiyuan 02-23	Shanxi		Gossypium hirsutum	(AD)1
94	GH0180	G5	Taiyuan 02-25	Shanxi		Gossypium hirsutum	(AD)1
95	GH0181	G3	Taiyuan 02-27	Shanxi		Gossypium hirsutum	(AD)1
96	GH0182	G3	Taiyuan 02-28	Shanxi		Gossypium hirsutum	(AD)1
97	GH0183	G3	Taiyuan 02-29	Shanxi		Gossypium hirsutum	(AD)1
98	GH0184	G3	Taiyuan 02-33	Shanxi		Gossypium hirsutum	(AD)1
99	GH0185	G3	Taiyuan 02-35	Shanxi		Gossypium hirsutum	(AD)1
100	GH0186	NA	Taiyuan 02-38	Shanxi		Gossypium hirsutum	(AD)1
101	GH0187	G3	Taiyuan 02-39	Shanxi		Gossypium hirsutum	(AD)1
102	GH0188	G2	Taiyuan 02-4	Shanxi		Gossypium hirsutum	(AD)1
103	GH0189	G3	Taiyuan 02-40	Shanxi		Gossypium hirsutum	(AD)1
104	GH0190	G3	Taiyuan 02-41	Shanxi		Gossypium hirsutum	(AD)1
105	GH0191	G5	Taiyuan 02-47	Shanxi		Gossypium hirsutum	(AD)1
106	GH0192	G5	Taiyuan 02-48	Shanxi		Gossypium hirsutum	(AD)1
107	GH0193	G5	Taiyuan 02-5	Shanxi		Gossypium hirsutum	(AD)1
108	GH0194	G2	Taiyuan 02-6	Shanxi		Gossypium hirsutum	(AD)1
109	GH0195	G5	Jinnongdayuan 2 (1)	Shanxi		Gossypium hirsutum	(AD)1
110	GH0196	G5	Jinnongdayuan 2 (3)	Shanxi		Gossypium hirsutum	(AD)1
111	GH0197	G4	Jinnongdayuan 5 (2)	Shanxi		Gossypium hirsutum	(AD)1
112	GH0198	G3	QB1	Uncertain		Gossypium hirsutum	(AD)1
113	GH0199	G5	HL07	Uncertain		Gossypium hirsutum	(AD)1
114	GH0200	G5	Langhuang F10W99	Henan		Gossypium hirsutum	(AD)1
115	GH0201	G5	Zhongyihong 2 (1)	Beijing		Gossypium hirsutum	(AD)1
116	GH0202	G5	Zhongyihong 8	Beijing		Gossypium hirsutum	(AD)1
117	GH0203	G5	Suyuan 04-2	Jiangsu		Gossypium hirsutum	(AD)1
118	GH0204	G5	Suyuan 04-3	Jiangsu		Gossypium hirsutum	(AD)1
119	GH0205	G5	Suyuan 04-4	Jiangsu		Gossypium hirsutum	(AD)1
120	GH0206	G4	Suyuan 04-6	Jiangsu		Gossypium hirsutum	(AD)1
121	GH0207	G3	Suyuan 04-7	Jiangsu		Gossypium hirsutum	(AD)1
122	GH0208	G5	Suyuan 04-8	Jiangsu		Gossypium hirsutum	(AD)1
123	GH0209	G4	Suyuan 04-10	Jiangsu		Gossypium hirsutum	(AD)1
124	GH0210	G5	Suyuan 04-16	Jiangsu		Gossypium hirsutum	(AD)1
125	GH0211	G5	Suyuan 04-17	Jiangsu		Gossypium hirsutum	(AD)1
126	GH0212	G4	Suyuan 04-18	Jiangsu		Gossypium hirsutum	(AD)1
127	GH0213	G3	Suyuan 04-21	Jiangsu		Gossypium hirsutum	(AD)1
128	GH0214	G5	Suyuan 04-32	Jiangsu		Gossypium hirsutum	(AD)1
129	GH0215	G5	Suyuan 04-33	Jiangsu		Gossypium hirsutum	(AD)1
130	GH0216	G5	Suyuan 04-34	Jiangsu		Gossypium hirsutum	(AD)1
131	GH0217	G3	Suyuan 04-35	Jiangsu		Gossypium hirsutum	(AD)1
132	GH0218	G4	Suyuan 04-38	Jiangsu		Gossypium hirsutum	(AD)1
133	GH0219	G4	Suyuan 04-43	Jiangsu		Gossypium hirsutum	(AD)1
134	GH0220	G5	Suyuan 04-49	Jiangsu		Gossypium hirsutum	(AD)1
135	GH0221	G5	Suyuan 04-51	Jiangsu		Gossypium hirsutum	(AD)1
136	GH0222	G5	Suyuan 04-52	Jiangsu		Gossypium hirsutum	(AD)1
137	GH0223	G5	Suyuan 04-53	Jiangsu		Gossypium hirsutum	(AD)1
138	GH0224	G5	Suyuan 04-57	Jiangsu		Gossypium hirsutum	(AD)1
139	GH0225	G5	Suyuan 04-60	Jiangsu		Gossypium hirsutum	(AD)1
140	GH0226	G4	Suyuan 04-64	Jiangsu		Gossypium hirsutum	(AD)1
141	GH0227	G5	Suyuan 04-65	Jiangsu		Gossypium hirsutum	(AD)1
142	GH0228	G4	Suyuan 04-75	Jiangsu		Gossypium hirsutum	(AD)1
143	GH0229	G5	Suyuan 04-76	Jiangsu		Gossypium hirsutum	(AD)1
144	GH0230	G3	Suyuan 04-82	Jiangsu		Gossypium hirsutum	(AD)1
145	GH0231	G5	Suyuan 04-83	Jiangsu		Gossypium hirsutum	(AD)1
146	GH0232	G4	Suyuan 04-84	Jiangsu		Gossypium hirsutum	(AD)1
147	GH0233	G4	Suyuan 04-85	Jiangsu		Gossypium hirsutum	(AD)1
148	GH0234	G4	Suyuan 04-86	Jiangsu		Gossypium hirsutum	(AD)1
149	GH0235	G4	Suyuan 04-87	Jiangsu		Gossypium hirsutum	(AD)1
150	GH0236	G4	Suyuan 04-88	Jiangsu		Gossypium hirsutum	(AD)1
151	GH0237	G5	Suyuan 04-90	Jiangsu		Gossypium hirsutum	(AD)1
152	GH0238	G4	Suyuan 04-91	Jiangsu		Gossypium hirsutum	(AD)1
153	GH0239	G4	Suyuan 04-92	Jiangsu		Gossypium hirsutum	(AD)1
154	GH0240	G4	Suyuan 04-93	Jiangsu		Gossypium hirsutum	(AD)1
155	GH0241	G4	Suyuan 04-94	Jiangsu		Gossypium hirsutum	(AD)1
156	GH0242	G5	Suyuan 04-96	Jiangsu		Gossypium hirsutum	(AD)1
157	GH0243	G5	Suyuan 04-97	Jiangsu		Gossypium hirsutum	(AD)1
158	GH0244	G4	Suyuan 04-98	Jiangsu		Gossypium hirsutum	(AD)1
159	GH0245	G4	Suyuan 04-106	Jiangsu		Gossypium hirsutum	(AD)1
160	GH0246	G5	Suyuan 04-108	Jiangsu		Gossypium hirsutum	(AD)1
161	GH0247	G5	Suyuan 04-109	Jiangsu		Gossypium hirsutum	(AD)1
162	GH0248	G5	Suyuan 04-112	Jiangsu		Gossypium hirsutum	(AD)1
163	GH0249	G5	Suyuan 04-113	Jiangsu		Gossypium hirsutum	(AD)1
164	GH0250	G5	Suyuan 04-114	Jiangsu		Gossypium hirsutum	(AD)1
165	GH0251	G5	Suyuan 04-115	Jiangsu		Gossypium hirsutum	(AD)1
166	GH0252	G3	Suyuan 04-116	Jiangsu		Gossypium hirsutum	(AD)1
167	GH0253	G4	Suyuan 04-120	Jiangsu		Gossypium hirsutum	(AD)1
168	GH0254	G4	Suyuan 04-123	Jiangsu		Gossypium hirsutum	(AD)1
169	GH0255	G5	Suyuan 04-126	Jiangsu		Gossypium hirsutum	(AD)1
170	GH0256	G3	Suyuan 04-129	Jiangsu		Gossypium hirsutum	(AD)1
171	GH0257	G5	Suyuan 04-136	Jiangsu		Gossypium hirsutum	(AD)1
172	GH0258	G5	Suyuan 04-137	Jiangsu		Gossypium hirsutum	(AD)1
173	GH0259	G5	Suyuan 04-138	Jiangsu		Gossypium hirsutum	(AD)1
174	GH0260	G4	Suyuan 04-140	Jiangsu		Gossypium hirsutum	(AD)1
175	GH0261	G4	Suyuan 04-145	Jiangsu		Gossypium hirsutum	(AD)1
176	GH0262	G5	Suyuan 04-148	Jiangsu		Gossypium hirsutum	(AD)1
177	GH0263	G4	Suyuan 04-149	Jiangsu		Gossypium hirsutum	(AD)1
178	GH0264	G4	Suyuan 04-151	Jiangsu		Gossypium hirsutum	(AD)1
179	GH0265	G5	Suyuan 04-156	Jiangsu		Gossypium hirsutum	(AD)1
180	GH0266	G2	Suyuan 04-161	Jiangsu		Gossypium hirsutum	(AD)1
181	GH0267	G5	Delcot 277-5 (1)	USA		Gossypium hirsutum	(AD)1
182	GH0268	G5	AC 241	USA		Gossypium hirsutum	(AD)1
183	GH0269	G5	Acala SJ-5	USA		Gossypium hirsutum	(AD)1
184	GH0270	G5	L231-24	Uncertain		Gossypium hirsutum	(AD)1
185	GH0271	G5	L142-9	Uncertain		Gossypium hirsutum	(AD)1
186	GH0272	G5	PD0113 (1)	USA		Gossypium hirsutum	(AD)1
187	GH0273	G5	PD9363	USA		Gossypium hirsutum	(AD)1
188	GH0274	G5	SC-1 (GP72)	USA		Gossypium hirsutum	(AD)1
189	GH0275	G5	PD9364	USA		Gossypium hirsutum	(AD)1
190	GH0276	G5	PD8619	USA		Gossypium hirsutum	(AD)1
191	GH0277	G5	FTA	USA		Gossypium hirsutum	(AD)1
192	GH0278	G5	AC 239	USA		Gossypium hirsutum	(AD)1
193	GH0279	G5	PD9232	USA		Gossypium hirsutum	(AD)1
194	GH0280	G5	PD2165 (1)	USA		Gossypium hirsutum	(AD)1
195	GH0282	G5	PD9223	USA		Gossypium hirsutum	(AD)1
196	GH0283	G3	PD6179	USA		Gossypium hirsutum	(AD)1
197	GH0284	G5	PD6142	USA		Gossypium hirsutum	(AD)1
198	GH0285	G3	ISA205 B396	Ivory Coast		Gossypium hirsutum	(AD)1
199	GH0286	G2	Tashkent 6	Former Soviet Union		Gossypium hirsutum	(AD)1
200	GH0287	G5	Sulianmian 142xi	Uncertain		Gossypium hirsutum	(AD)1
201	GH0288	G2	Sulianmian 143xi	Uncertain		Gossypium hirsutum	(AD)1
202	GH0289	G4	TM-1 (2)	USA		Gossypium hirsutum	(AD)1
203	GH0290	G5	Zhongwu 383 ("low gossypol")	Henan	YER	Gossypium hirsutum	(AD)1
204	GH0291	G4	E E80-11	Hubei		Gossypium hirsutum	(AD)1
205	GH0292	G5	Penghun 1	Hubei		Gossypium hirsutum	(AD)1
206	GH0293	G5	Yahuang 9101	Henan		Gossypium hirsutum	(AD)1
207	GH0294	G5	Yahuang 9102	Henan		Gossypium hirsutum	(AD)1
208	GH0295	G5	Yahuang 9103	Henan		Gossypium hirsutum	(AD)1
209	GH0296	G5	Hongyemian 1	Sichuan		Gossypium hirsutum	(AD)1
210	GH0297	G5	Lang huang F10 (brown fiber)	Henan		Gossypium hirsutum	(AD)1
211	GH0298	G5	Zongxu 1 (1)	Henan	YER	Gossypium hirsutum	(AD)1
212	GH0299	G5	Zong 1-62	Henan		Gossypium hirsutum	(AD)1
213	GH0300	G5	Zong 1-59	Henan		Gossypium hirsutum	(AD)1
214	GH0301	G3	DZA (71) 39	Zambia		Gossypium hirsutum	(AD)1
215	GH0302	G5	Del Cerro 240-12	Brazil		Gossypium hirsutum	(AD)1
216	GH0303	G5	Gossica 23	Columbia		Gossypium hirsutum	(AD)1
217	GH0304	G5	AM-55	Uncertain		Gossypium hirsutum	(AD)1
218	GH0305	G2	Aleppo 40	Syria		Gossypium hirsutum	(AD)1
219	GH0306	G3	33	Uncertain		Gossypium hirsutum	(AD)1
220	GH0307	G3	86 III 72	Uncertain		Gossypium hirsutum	(AD)1
221	GH0308	G3	ВИР-41 5533у х С-3210	Former Soviet Union		Gossypium hirsutum	(AD)1
222	GH0309	G3	Local cotton (2)	Former Soviet Union		Gossypium hirsutum	(AD)1
223	GH0310	G5	Columbia (1)	USA		Gossypium hirsutum	(AD)1
224	GH0311	G2	Cleveland big ball	USA		Gossypium hirsutum	(AD)1
225	GH0312	G2	G.mexicanum	Mexico		Gossypium hirsutum	(AD)1
226	GH0313	G5	3712-Ashmuouni-135	Uncertain		Gossypium hirsutum	(AD)1
227	GH0314	G4	Ucayali	Peru		Gossypium hirsutum	(AD)1
228	GH0315	G2	Taschkent upland	Former Soviet Union		Gossypium hirsutum	(AD)1
229	GH0316	G3	Yu 136	Henan		Gossypium hirsutum	(AD)1
230	GH0317	G2	Yu 138	Henan		Gossypium hirsutum	(AD)1
231	GH0318	G2	Yu 141	Henan		Gossypium hirsutum	(AD)1
232	GH0319	G3	L×71	Uncertain		Gossypium hirsutum	(AD)1
233	GH0320	G4	Pahta	Former Soviet Union		Gossypium hirsutum	(AD)1
234	GH0321	G3	Bar Ballina	Sudan		Gossypium hirsutum	(AD)1
235	GH0322	G4	6086	Uncertain		Gossypium hirsutum	(AD)1
236	GH0323	G3	Acc.N5 fr.5	Uncertain		Gossypium hirsutum	(AD)1
237	GH0324	G3	Dixie King (2)	USA		Gossypium hirsutum	(AD)1
238	GH0325	G5	153F	Former Soviet Union		Gossypium hirsutum	(AD)1
239	GH0326	G3	Yu 79	Henan	YER	Gossypium hirsutum	(AD)1
240	GH0327	G5	Half and Half (2)	USA		Gossypium hirsutum	(AD)1
241	GH0328	G3	147F	Former Soviet Union		Gossypium hirsutum	(AD)1
242	GH0329	G5	Tashkent 2 (1)	Former Soviet Union		Gossypium hirsutum	(AD)1
243	GH0330	G3	Andijan 35	Former Soviet Union		Gossypium hirsutum	(AD)1
244	GH0331	G2	American cotton (local zavodskaya smes)	Uncertain		Gossypium hirsutum	(AD)1
245	GH0332	G3	45505	Uncertain		Gossypium hirsutum	(AD)1
246	GH0333	G5	12785	Uncertain		Gossypium hirsutum	(AD)1
247	GH0334	G2	14F-2	Former Soviet Union		Gossypium hirsutum	(AD)1
248	GH0335	G2	Encino Texas 2-2	Mexico		Gossypium hirsutum	(AD)1
249	GH0336	G5	2034 В.8	Uncertain		Gossypium hirsutum	(AD)1
250	GH0337	G4	Triumph Lot39-1	Uncertain		Gossypium hirsutum	(AD)1
251	GH0338	G2	C 1582	Former Soviet Union		Gossypium hirsutum	(AD)1
252	GH0339	G5	US 219-3	Uncertain		Gossypium hirsutum	(AD)1
253	GH0340	G5	Sakel VIR171Lu-1	Former Soviet Union		Gossypium hirsutum	(AD)1
254	GH0341	G5	Yu118 VIR3177-4	Former Soviet Union		Gossypium hirsutum	(AD)1
255	GH0342	G3	G. amerccana	France		Gossypium hirsutum	(AD)1
256	GH0343	G4	2692	Uncertain		Gossypium hirsutum	(AD)1
257	GH0344	G3	282700	Uncertain		Gossypium hirsutum	(AD)1
258	GH0345	G3	288544	Uncertain		Gossypium hirsutum	(AD)1
259	GH0346	G3	Gel 1059	Former Soviet Union		Gossypium hirsutum	(AD)1
260	GH0347	G5	AR 1-59	Former Soviet Union		Gossypium hirsutum	(AD)1
261	GH0348	G3	C6 CV 86 S 5-17	Albania		Gossypium hirsutum	(AD)1
262	GH0349	G2	L-500	Uncertain		Gossypium hirsutum	(AD)1
263	GH0350	G3	Local	Former Soviet Union		Gossypium hirsutum	(AD)1
264	GH0351	G3	Pontos	Greece		Gossypium hirsutum	(AD)1
265	GH0352	G3	Morado	Venezuela		Gossypium hirsutum	(AD)1
266	GH0353	G3	N 205(A)	Iran		Gossypium hirsutum	(AD)1
267	GH0354	G5	GSA 75(A*)	Uncertain		Gossypium hirsutum	(AD)1
268	GH0355	G3	Catania A*	Italy		Gossypium hirsutum	(AD)1
269	GH0356	G4	DP 140-7BC (A)	USA		Gossypium hirsutum	(AD)1
270	GH0357	G3	SR 60	Thailand		Gossypium hirsutum	(AD)1
271	GH0358	G2	SS 3\10 A	Uncertain		Gossypium hirsutum	(AD)1
272	GH0359	G5	La Chata	Spain		Gossypium hirsutum	(AD)1
273	GH0360	G5	M2 (Round leaf)	Former Soviet Union		Gossypium hirsutum	(AD)1
274	GH0361	G2	Griffith	USA		Gossypium hirsutum	(AD)1
275	GH0362	G3	N 834	Iran		Gossypium hirsutum	(AD)1
276	GH0363	G2	VIR556365	Former Soviet Union		Gossypium hirsutum	(AD)1
277	GH0364	G5	Al-1	Uncertain		Gossypium hirsutum	(AD)1
278	GH0365	G5	T AC/20	Uncertain		Gossypium hirsutum	(AD)1
279	GH0366	G3	w/n	Former Soviet Union		Gossypium hirsutum	(AD)1
280	GH0367	G5	Sind Sudhar	India		Gossypium hirsutum	(AD)1
281	GH0368	G5	Szekkutasi 06	Hungary		Gossypium hirsutum	(AD)1
282	GH0369	G3	Timopheevii Dec	Mexico		Gossypium hirsutum	(AD)1
283	GH0370	G3	402	Anhui		Gossypium hirsutum	(AD)1
284	GH0371	G2	Pamuk	Turkey		Gossypium hirsutum	(AD)1
285	GH0372	G5	Wacona	USA		Gossypium hirsutum	(AD)1
286	GH0373	G5	S-1191	Former Soviet Union		Gossypium hirsutum	(AD)1
287	GH0374	G3	S-3316	Former Soviet Union		Gossypium hirsutum	(AD)1
288	GH0375	G4	D-9	Uncertain		Gossypium hirsutum	(AD)1
289	GH0376	G5	S-1211	Former Soviet Union		Gossypium hirsutum	(AD)1
290	GH0377	G3	Deltapine 12	USA		Gossypium hirsutum	(AD)1
291	GH0378	G5	Deltapine 13	USA		Gossypium hirsutum	(AD)1
292	GH0379	G5	Deltapine 15 (1)	USA		Gossypium hirsutum	(AD)1
293	GH0380	G5	Coker 304	USA		Gossypium hirsutum	(AD)1
294	GH0381	G4	Coker 310	USA		Gossypium hirsutum	(AD)1
295	GH0382	G4	Coker 413	USA		Gossypium hirsutum	(AD)1
296	GH0383	G5	Coker Foster 6	USA		Gossypium hirsutum	(AD)1
297	GH0384	G4	Coker Queen	USA		Gossypium hirsutum	(AD)1
298	GH0385	G4	Stoneville 2 (2)	USA		Gossypium hirsutum	(AD)1
299	GH0386	G4	Stoneville 4A	USA		Gossypium hirsutum	(AD)1
300	GH0387	G5	Stoneville 5A (2)	USA		Gossypium hirsutum	(AD)1
301	GH0388	G5	Startex 619	USA		Gossypium hirsutum	(AD)1
302	GH0389	G4	Paymaster 18	USA		Gossypium hirsutum	(AD)1
303	GH0390	G3	Paymaster 101B	USA		Gossypium hirsutum	(AD)1
304	GH0391	G5	Paymaster 202	USA		Gossypium hirsutum	(AD)1
305	GH0392	G5	Paymaster 266	USA		Gossypium hirsutum	(AD)1
306	GH0393	G4	Paymaster 785	USA		Gossypium hirsutum	(AD)1
307	GH0394	G3	Acala 1517-D	USA		Gossypium hirsutum	(AD)1
308	GH0395	G3	Acala 1517-75	USA		Gossypium hirsutum	(AD)1
309	GH0396	G4	Acala 5701-W	USA		Gossypium hirsutum	(AD)1
310	GH0397	G4	New Boykin	USA		Gossypium hirsutum	(AD)1
311	GH0398	G3	Lockett BXL	USA		Gossypium hirsutum	(AD)1
312	GH0399	G5	Dixie King (1)	USA		Gossypium hirsutum	(AD)1
313	GH0400	G4	Dixie King 14-9	USA		Gossypium hirsutum	(AD)1
314	GH0401	G5	Dixie Triumph 85	USA		Gossypium hirsutum	(AD)1
315	GH0402	G5	Half and Half (1)	USA		Gossypium hirsutum	(AD)1
316	GH0403	G2	Foster 13-46-102-3B	USA		Gossypium hirsutum	(AD)1
317	GH0404	G4	Piedmont Cleveland	USA		Gossypium hirsutum	(AD)1
318	GH0405	G5	PD0695	USA		Gossypium hirsutum	(AD)1
319	GH0406	G3	PD0875	USA		Gossypium hirsutum	(AD)1
320	GH0407	G5	McNair 220	USA		Gossypium hirsutum	(AD)1
321	GH0408	G5	McNair 308	USA		Gossypium hirsutum	(AD)1
322	GH0409	G5	Acala 4-42	USA		Gossypium hirsutum	(AD)1
323	GH0410	G5	PD0259	USA		Gossypium hirsutum	(AD)1
324	GH0411	G5	PD4548	USA		Gossypium hirsutum	(AD)1
325	GH0412	G5	PD4461	USA		Gossypium hirsutum	(AD)1
326	GH0413	G4	Delfos 4313	USA		Gossypium hirsutum	(AD)1
327	GH0414	G2	Auburn 612RNR	USA		Gossypium hirsutum	(AD)1
328	GH0415	G3	PD6044	USA		Gossypium hirsutum	(AD)1
329	GH0416	G5	AC 235	USA		Gossypium hirsutum	(AD)1
330	GH0417	G3	Auburn 556RNR	USA		Gossypium hirsutum	(AD)1
331	GH0418	G3	PD0804 (W)	USA		Gossypium hirsutum	(AD)1
332	GH0419	G5	PD6132	USA		Gossypium hirsutum	(AD)1
333	GH0420	G5	PD6208	USA		Gossypium hirsutum	(AD)1
334	GH0421	G5	PD6992	USA		Gossypium hirsutum	(AD)1
335	GH0422	G5	Quapaw	USA		Gossypium hirsutum	(AD)1
336	GH0423	G5	FB20 (FB20)	USA		Gossypium hirsutum	(AD)1
337	GH0424	G4	Deltapine 45	USA		Gossypium hirsutum	(AD)1
338	GH0425	G5	Arcot 1	USA		Gossypium hirsutum	(AD)1
339	GH0426	G2	Arcot 402bne	USA		Gossypium hirsutum	(AD)1
340	GH0427	G5	DES 936	USA		Gossypium hirsutum	(AD)1
341	GH0428	G3	Delfos 42-424	USA		Gossypium hirsutum	(AD)1
342	GH0429	G3	Deltapine 11	USA		Gossypium hirsutum	(AD)1
343	GH0430	G3	Coker 4-15	USA		Gossypium hirsutum	(AD)1
344	GH0431	G3	Lightning Express (Shan)	USA		Gossypium hirsutum	(AD)1
345	GH0432	G4	King (1)	USA		Gossypium hirsutum	(AD)1
346	GH0433	G3	Express (1)	USA		Gossypium hirsutum	(AD)1
347	GH0434	G5	Coker 100 str.1	USA		Gossypium hirsutum	(AD)1
348	GH0435	G4	Coker Foster	USA		Gossypium hirsutum	(AD)1
349	GH0436	G3	Mebane Triumph (2)	USA		Gossypium hirsutum	(AD)1
350	GH0437	G5	Lone star 3312	USA		Gossypium hirsutum	(AD)1
351	GH0438	G4	Trice 251	USA		Gossypium hirsutum	(AD)1
352	GH0440	G5	Delfos 9169A (1)	USA		Gossypium hirsutum	(AD)1
353	GH0441	G5	Tamcot SP37 (Upland 56)	USA		Gossypium hirsutum	(AD)1
354	GH0442	G5	Rex Smooth Leaf	USA		Gossypium hirsutum	(AD)1
355	GH0443	G5	Hopi M ("low gossypol")	USA		Gossypium hirsutum	(AD)1
356	GH0444	G3	Lockett 22 ("low gossypol")	USA		Gossypium hirsutum	(AD)1
357	GH0445	G5	PD7596 (fg)	USA		Gossypium hirsutum	(AD)1
358	GH0446	G5	ICA-161-74	Peru		Gossypium hirsutum	(AD)1
359	GH0447	G5	ICA-183-81	Peru		Gossypium hirsutum	(AD)1
360	GH0448	G5	ICA-805-W-63	Peru		Gossypium hirsutum	(AD)1
361	GH0449	G5	SAENZ PENA 61	Argentina		Gossypium hirsutum	(AD)1
362	GH0450	G5	GRINGO INTA	Argentina		Gossypium hirsutum	(AD)1
363	GH0451	G3	GUAZUNCHO 2 INTA	Argentina		Gossypium hirsutum	(AD)1
364	GH0452	G5	PORO INTA	Argentina		Gossypium hirsutum	(AD)1
365	GH0453	G3	Tex 2382	USA		Gossypium hirsutum	(AD)1
366	GH0454	G4	Peru cotton	Uncertain		Gossypium hirsutum	(AD)1
367	GH0455	G2	PAR-51	Pakistan		Gossypium hirsutum	(AD)1
368	GH0456	G5	Bamdax	Japan		Gossypium hirsutum	(AD)1
369	GH0457	G5	Nepal 1	Nepal		Gossypium hirsutum	(AD)1
370	GH0458	G3	Mexico 910	Mexico		Gossypium hirsutum	(AD)1
371	GH0459	G4	Samaru 26J	Nigeria		Gossypium hirsutum	(AD)1
372	GH0460	G3	Nigeria cotton	Uncertain		Gossypium hirsutum	(AD)1
373	GH0461	G5	Caeri 76	Mexico		Gossypium hirsutum	(AD)1
374	GH0462	G5	Z441-2	Chad		Gossypium hirsutum	(AD)1
375	GH0463	G3	T120-7	France		Gossypium hirsutum	(AD)1
376	GH0464	G3	Reba P279	Paraguay		Gossypium hirsutum	(AD)1
377	GH0465	G5	Brazil co-op cotton	Uncertain		Gossypium hirsutum	(AD)1
378	GH0466	G4	MA-6 (1)	India		Gossypium hirsutum	(AD)1
379	GH0467	G5	M-1A	India		Gossypium hirsutum	(AD)1
380	GH0468	G5	BPA 68	Uganda		Gossypium hirsutum	(AD)1
381	GH0469	G5	Brazil cotton (1)	Uncertain		Gossypium hirsutum	(AD)1
382	GH0470	G4	Argentina cotton	Uncertain		Gossypium hirsutum	(AD)1
383	GH0471	G5	PAN 575	Chad		Gossypium hirsutum	(AD)1
384	GH0472	G2	Y1422	Chad		Gossypium hirsutum	(AD)1
385	GH0473	G5	4SA-805	Greece		Gossypium hirsutum	(AD)1
386	GH0474	G4	IRMA 96+97	Cameroon		Gossypium hirsutum	(AD)1
387	GH0475	G4	HC4-75	Mali		Gossypium hirsutum	(AD)1
388	GH0476	G3	71467 (1)	Greece		Gossypium hirsutum	(AD)1
389	GH0477	G3	J24	Syria		Gossypium hirsutum	(AD)1
390	GH0478	G5	IRMA 1234	Cameroon		Gossypium hirsutum	(AD)1
391	GH0479	G5	E88127	Uncertain		Gossypium hirsutum	(AD)1
392	GH0480	G5	FH 87	Pakistan		Gossypium hirsutum	(AD)1
393	GH0481	G5	CIM 70	Pakistan		Gossypium hirsutum	(AD)1
394	GH0482	G3	B557	Pakistan		Gossypium hirsutum	(AD)1
395	GH0483	G4	NK-245	Turkey		Gossypium hirsutum	(AD)1
396	GH0484	G5	QF-10/1	Turkey		Gossypium hirsutum	(AD)1
397	GH0485	G3	Laxmi	India		Gossypium hirsutum	(AD)1
398	GH0486	G5	MNH-129	Pakistan		Gossypium hirsutum	(AD)1
399	GH0487	G4	GH-6-2-75	France		Gossypium hirsutum	(AD)1
400	GH0488	G3	Reba B50	Paraguay		Gossypium hirsutum	(AD)1
401	GH0489	G5	IAPAR45PARANA'2	Brazil		Gossypium hirsutum	(AD)1
402	GH0490	G5	CS 50	Australia		Gossypium hirsutum	(AD)1
403	GH0491	G5	n41 57-2n	Australia		Gossypium hirsutum	(AD)1
404	GH0492	G5	n74 250 (2)	Australia		Gossypium hirsutum	(AD)1
405	GH0493	G5	n74 480	Australia		Gossypium hirsutum	(AD)1
406	GH0494	G4	n74 666	Australia		Gossypium hirsutum	(AD)1
407	GH0495	G5	n74 720	Australia		Gossypium hirsutum	(AD)1
408	GH0496	G4	n74 873	Australia		Gossypium hirsutum	(AD)1
409	GH0497	G5	n98 247	Australia		Gossypium hirsutum	(AD)1
410	GH0498	G3	n98 283	Australia		Gossypium hirsutum	(AD)1
411	GH0499	G5	Sicot 1	Australia		Gossypium hirsutum	(AD)1
412	GH0500	G5	Siokra 107B	Australia		Gossypium hirsutum	(AD)1
413	GH0501	G5	Siokra 317	Uncertain		Gossypium hirsutum	(AD)1
414	GH0502	G5	Uganda 3 (1)	Uncertain		Gossypium hirsutum	(AD)1
415	GH0503	G4	BAR 7/1	Uncertain		Gossypium hirsutum	(AD)1
416	GH0504	G3	CIM 91	Pakistan		Gossypium hirsutum	(AD)1
417	GH0505	G4	rk4-4	Vietnam		Gossypium hirsutum	(AD)1
418	GH0506	G3	TH1	Vietnam		Gossypium hirsutum	(AD)1
419	GH0507	G3	M5-2	Mexico		Gossypium hirsutum	(AD)1
420	GH0508	G5	NAZAS-92	Mexico		Gossypium hirsutum	(AD)1
421	GH0509	G5	Brazil 012	Uncertain		Gossypium hirsutum	(AD)1
422	GH0510	G3	M5-1	Mexico		Gossypium hirsutum	(AD)1
423	GH0511	G5	Brazil 005	Uncertain		Gossypium hirsutum	(AD)1
424	GH0512	G3	H-S-25	India		Gossypium hirsutum	(AD)1
425	GH0513	G5	Mnucotn1244B	Mexico		Gossypium hirsutum	(AD)1
426	GH0514	G2	MS72	Mexico		Gossypium hirsutum	(AD)1
427	GH0515	G2	Brazil 008	Uncertain		Gossypium hirsutum	(AD)1
428	GH0516	G3	Brazil 001	Uncertain		Gossypium hirsutum	(AD)1
429	GH0517	G4	Brazil 010	Uncertain		Gossypium hirsutum	(AD)1
430	GH0518	G5	Brazil 014	Uncertain		Gossypium hirsutum	(AD)1
431	GH0519	G3	Brazil 004	Uncertain		Gossypium hirsutum	(AD)1
432	GH0520	G5	Brazil 011	Uncertain		Gossypium hirsutum	(AD)1
433	GH0521	G3	CF-43/2 (2)	Turkey		Gossypium hirsutum	(AD)1
434	GH0522	G2	E-21-17-711	China		Gossypium hirsutum	(AD)1
435	GH0523	G2	Rode (203-855-4)	Uncertain		Gossypium hirsutum	(AD)1
436	GH0524	G2	82160 PC-10	Pakistan		Gossypium hirsutum	(AD)1
437	GH0525	G2	82161 PC-9	Pakistan		Gossypium hirsutum	(AD)1
438	GH0526	G2	82162 PC-14	Pakistan		Gossypium hirsutum	(AD)1
439	GH0527	G2	82164 PC-8	Pakistan		Gossypium hirsutum	(AD)1
440	GH0528	G2	82165 PC-6	Pakistan		Gossypium hirsutum	(AD)1
441	GH0529	G5	82167 PC-11	Pakistan		Gossypium hirsutum	(AD)1
442	GH0530	G5	82172 PC-17	Pakistan		Gossypium hirsutum	(AD)1
443	GH0531	G2	82176 N-3	Pakistan		Gossypium hirsutum	(AD)1
444	GH0532	G2	82177 N-7	Pakistan		Gossypium hirsutum	(AD)1
445	GH0533	G5	821800 N-11	Pakistan		Gossypium hirsutum	(AD)1
446	GH0534	G5	82183 V-10	Pakistan		Gossypium hirsutum	(AD)1
447	GH0535	G5	4612Lu 188	Henan		Gossypium hirsutum	(AD)1
448	GH0536	G5	Zhong R971708	Henan		Gossypium hirsutum	(AD)1
449	GH0537	G4	M23Bt	Henan		Gossypium hirsutum	(AD)1
450	GH0538	G5	Zhong 1441 (1)	Henan		Gossypium hirsutum	(AD)1
451	GH0539	G5	Zhong 335223	Henan		Gossypium hirsutum	(AD)1
452	GH0540	G5	Zhong 1421 (2)	Henan		Gossypium hirsutum	(AD)1
453	GH0541	G5	Jishentechangrong	Hebei		Gossypium hirsutum	(AD)1
454	GH0542	G5	Jisheng 09naiyan-1	Hebei		Gossypium hirsutum	(AD)1
455	GH0543	G5	Ari3697 (1)	Henan		Gossypium hirsutum	(AD)1
456	GH0544	G5	A971Bt (1)	Henan		Gossypium hirsutum	(AD)1
457	GH0545	G5	4133Bt (2)	Henan		Gossypium hirsutum	(AD)1
458	GH0546	G5	J02-247 (2)	Jiangsu		Gossypium hirsutum	(AD)1
459	GH0547	G2	Zhong 129	Henan		Gossypium hirsutum	(AD)1
460	GH0548	G5	Zhong 21371 (1)	Henan		Gossypium hirsutum	(AD)1
461	GH0549	G5	A41772BBt (1)	Henan		Gossypium hirsutum	(AD)1
462	GH0550	G5	1008	Henan		Gossypium hirsutum	(AD)1
463	GH0551	G5	9909	USA		Gossypium hirsutum	(AD)1
464	GH0552	G5	M21Bt	Henan		Gossypium hirsutum	(AD)1
465	GH0553	G5	Lu 16188Bt	Henan		Gossypium hirsutum	(AD)1
466	GH0554	G5	Lu R8166Bt	Shandong		Gossypium hirsutum	(AD)1
467	GH0555	G5	Jisheng 178	Hebei	YER	Gossypium hirsutum	(AD)1
468	GH0556	G5	Zhong 9901991	Henan		Gossypium hirsutum	(AD)1
469	GH0557	G5	12S165	Shanxi		Gossypium hirsutum	(AD)1
470	GH0558	G5	Jizi 1	Hebei		Gossypium hirsutum	(AD)1
471	GH0559	G5	Jizi 3	Hebei		Gossypium hirsutum	(AD)1
472	GH0560	G5	Jizi 4	Hebei		Gossypium hirsutum	(AD)1
473	GH0561	G5	Jizi 6	Hebei		Gossypium hirsutum	(AD)1
474	GH0562	G5	Jizi 7	Hebei		Gossypium hirsutum	(AD)1
475	GH0563	G5	Jizi 9	Hebei		Gossypium hirsutum	(AD)1
476	GH0564	G5	Jizi 14	Hebei		Gossypium hirsutum	(AD)1
477	GH0565	G5	Jizi 18	Hebei		Gossypium hirsutum	(AD)1
478	GH0566	G5	Jizi 20	Hebei		Gossypium hirsutum	(AD)1
479	GH0567	G5	Jizi 22	Hebei		Gossypium hirsutum	(AD)1
480	GH0568	G5	Jizi 23	Hebei		Gossypium hirsutum	(AD)1
481	GH0569	G5	Jizi 28	Hebei		Gossypium hirsutum	(AD)1
482	GH0570	G5	Jizi 29	Hebei		Gossypium hirsutum	(AD)1
483	GH0571	G5	Jizi 31	Hebei		Gossypium hirsutum	(AD)1
484	GH0572	G5	Jizi 33	Hebei		Gossypium hirsutum	(AD)1
485	GH0573	G5	Jizi 36	Hebei		Gossypium hirsutum	(AD)1
486	GH0574	G5	Jizi 40	Hebei		Gossypium hirsutum	(AD)1
487	GH0575	G5	Jizi 42	Hebei		Gossypium hirsutum	(AD)1
488	GH0576	G5	Jizi 44	Hebei		Gossypium hirsutum	(AD)1
489	GH0577	G5	Jizi 45	Hebei		Gossypium hirsutum	(AD)1
490	GH0578	G5	Jizi 47	Hebei		Gossypium hirsutum	(AD)1
491	GH0579	G5	Jizi 49	Hebei		Gossypium hirsutum	(AD)1
492	GH0580	G5	Jizi 51	Hebei		Gossypium hirsutum	(AD)1
493	GH0581	G5	Jizi 52	Hebei		Gossypium hirsutum	(AD)1
494	GH0582	G5	Jizi 53	Hebei		Gossypium hirsutum	(AD)1
495	GH0583	G3	Han 74xuan 209	Hebei		Gossypium hirsutum	(AD)1
496	GH0584	G4	Suyuan 04-1	Jiangsu		Gossypium hirsutum	(AD)1
497	GH0585	G3	FJA	USA		Gossypium hirsutum	(AD)1
498	GH0586	G5	PD3249	USA		Gossypium hirsutum	(AD)1
499	GH0587	G2	Meade	USA		Gossypium hirsutum	(AD)1
500	GH0588	G3	Durango	Mexico		Gossypium hirsutum	(AD)1
501	GH0589	G2	8517	Former Soviet Union		Gossypium hirsutum	(AD)1
502	GH0590	G2	G.purpurascens-1	China		Gossypium hirsutum	(AD)1
503	GH0591	G2	American cotton (zavodskaya smes)	Uncertain		Gossypium hirsutum	(AD)1
504	GH0592	G2	C10 CV 61-72	Albania		Gossypium hirsutum	(AD)1
505	GH0593	G4	EK(A)	Uncertain		Gossypium hirsutum	(AD)1
506	GH0594	G5	Acala 1517	USA		Gossypium hirsutum	(AD)1
507	GH0595	G3	Acala	USA		Gossypium hirsutum	(AD)1
508	GH0596	G5	Coker 311	USA		Gossypium hirsutum	(AD)1
509	GH0597	G5	Coker	USA		Gossypium hirsutum	(AD)1
510	GH0599	G3	Brazil 007	Uncertain		Gossypium hirsutum	(AD)1
511	GH0600	G3	Luyuan 343 (2)	Shandong	YER	Gossypium hirsutum	(AD)1
512	GH0601	G5	R039108	Henan		Gossypium hirsutum	(AD)1
513	GH0602	G5	LA887xiu Bt	Henan		Gossypium hirsutum	(AD)1
514	GH0603	G3	Zhong 142110	Henan		Gossypium hirsutum	(AD)1
515	GH0604	G5	Jizi 17	Hebei		Gossypium hirsutum	(AD)1
516	GH0605	G5	Jizi 54	Hebei		Gossypium hirsutum	(AD)1
517	GH0606	G5	Jizi 55	Hebei		Gossypium hirsutum	(AD)1
518	GH0607	G5	Jizi 57	Hebei		Gossypium hirsutum	(AD)1
519	GH0608	G5	Jizi 58	Hebei		Gossypium hirsutum	(AD)1
520	GH0609	G5	Jizi 60	Hebei		Gossypium hirsutum	(AD)1
521	GH0610	G5	Jizi 61	Hebei		Gossypium hirsutum	(AD)1
522	GH0611	G5	Jizi 62	Hebei		Gossypium hirsutum	(AD)1
523	GH0612	G5	Jizi 64	Hebei		Gossypium hirsutum	(AD)1
524	GH0613	G5	Jizi 65	Hebei		Gossypium hirsutum	(AD)1
525	GH0614	G5	Jizi 66	Hebei		Gossypium hirsutum	(AD)1
526	GH0615	G5	Jizi 67	Hebei		Gossypium hirsutum	(AD)1
527	GH0616	G5	Jizi 68	Hebei		Gossypium hirsutum	(AD)1
528	GH0617	G5	Jizi 70	Hebei		Gossypium hirsutum	(AD)1
529	GH0618	G5	Jizi 72	Hebei		Gossypium hirsutum	(AD)1
530	GH0619	G5	Jizi 73	Hebei		Gossypium hirsutum	(AD)1
531	GH0620	G5	Jizi 75	Hebei		Gossypium hirsutum	(AD)1
532	GH0621	G5	Jizi 76	Hebei		Gossypium hirsutum	(AD)1
533	GH0622	G5	Jizi 77	Hebei		Gossypium hirsutum	(AD)1
534	GH0623	G5	Jizi 78	Hebei		Gossypium hirsutum	(AD)1
535	GH0624	G5	Jizi 80	Hebei		Gossypium hirsutum	(AD)1
536	GH0625	G5	Jizi 81	Hebei		Gossypium hirsutum	(AD)1
537	GH0626	G5	Jizi 82	Hebei		Gossypium hirsutum	(AD)1
538	GH0627	G5	Jizi 83	Hebei		Gossypium hirsutum	(AD)1
539	GH0628	G5	Jizi 84	Hebei		Gossypium hirsutum	(AD)1
540	GH0629	G5	Jizi 85	Hebei		Gossypium hirsutum	(AD)1
541	GH0630	G5	Jizi 86	Hebei		Gossypium hirsutum	(AD)1
542	GH0631	G5	Jizi 89	Hebei		Gossypium hirsutum	(AD)1
543	GH0632	G5	Jizi 91	Hebei		Gossypium hirsutum	(AD)1
544	GH0633	G5	Jizi 92	Hebei		Gossypium hirsutum	(AD)1
545	GH0634	G5	Jizi 94	Hebei		Gossypium hirsutum	(AD)1
546	GH0635	G5	Jizi 96	Hebei		Gossypium hirsutum	(AD)1
547	GH0636	G5	X15648	Uncertain		Gossypium hirsutum	(AD)1
548	GH0637	G3	Suyan 6002	Jiangsu		Gossypium hirsutum	(AD)1
549	GH0638	G5	Suyan 6004	Jiangsu		Gossypium hirsutum	(AD)1
550	GH0639	G5	Suyan 6006	Jiangsu		Gossypium hirsutum	(AD)1
551	GH0640	G4	Suyuan 0011	Jiangsu		Gossypium hirsutum	(AD)1
552	GH0641	G4	Suyuan 0030	Jiangsu		Gossypium hirsutum	(AD)1
553	GH0642	G4	Suyuan 0042	Jiangsu		Gossypium hirsutum	(AD)1
554	GH0643	G5	Suyuan 1004	Jiangsu		Gossypium hirsutum	(AD)1
555	GH0644	G5	Suyuan 1008	Jiangsu		Gossypium hirsutum	(AD)1
556	GH0645	G4	Suyuan 1013	Jiangsu		Gossypium hirsutum	(AD)1
557	GH0646	G5	Suyuan 1015	Jiangsu		Gossypium hirsutum	(AD)1
558	GH0647	G4	Suyuan 1017	Jiangsu		Gossypium hirsutum	(AD)1
559	GH0648	G3	Suyuan 1019	Jiangsu		Gossypium hirsutum	(AD)1
560	GH0649	G4	Suyuan 1024	Jiangsu		Gossypium hirsutum	(AD)1
561	GH0650	G5	Suyuan 1026	Jiangsu		Gossypium hirsutum	(AD)1
562	GH0651	G4	Suyuan 1028	Jiangsu		Gossypium hirsutum	(AD)1
563	GH0652	G4	Suyuan 1034	Jiangsu		Gossypium hirsutum	(AD)1
564	GH0653	G5	Suyuan 1037	Jiangsu		Gossypium hirsutum	(AD)1
565	GH0654	G5	Suyuan 1045	Jiangsu		Gossypium hirsutum	(AD)1
566	GH0655	G3	Suyuan 1048	Jiangsu		Gossypium hirsutum	(AD)1
567	GH0656	G4	Suyuan 1061	Jiangsu		Gossypium hirsutum	(AD)1
568	GH0657	G5	Lu 91362	Shandong		Gossypium hirsutum	(AD)1
569	GH0658	G5	Lumian 241	Shandong	YER	Gossypium hirsutum	(AD)1
570	GH0659	G5	Lumian 303	Shandong		Gossypium hirsutum	(AD)1
571	GH0660	G5	Lu 7151	Shandong		Gossypium hirsutum	(AD)1
572	GH0661	G5	Lumian 352	Shandong		Gossypium hirsutum	(AD)1
573	GH0662	G5	Lu R0334	Shandong		Gossypium hirsutum	(AD)1
574	GH0663	G5	Lu R1054	Shandong		Gossypium hirsutum	(AD)1
575	GH0664	G5	Lu R0295	Shandong		Gossypium hirsutum	(AD)1
576	GH0665	G5	Lumian 361	Shandong		Gossypium hirsutum	(AD)1
577	GH0666	G5	Lumian 336	Shandong		Gossypium hirsutum	(AD)1
578	GH0667	G5	Lu 310992	Shandong		Gossypium hirsutum	(AD)1
579	GH0668	G5	Lu 4027	Shandong		Gossypium hirsutum	(AD)1
580	GH0669	G5	Lu 5288	Shandong		Gossypium hirsutum	(AD)1
581	GH0670	G5	Lu S1399	Shandong		Gossypium hirsutum	(AD)1
582	GH0671	G5	Lu 9136	Shandong		Gossypium hirsutum	(AD)1
583	GH0672	G5	Lu 5297	Shandong		Gossypium hirsutum	(AD)1
584	GH0673	G5	Lu 31089	Shandong		Gossypium hirsutum	(AD)1
585	GH0674	G5	Lu 90681	Shandong		Gossypium hirsutum	(AD)1
586	GH0675	G5	Lu R1075	Shandong		Gossypium hirsutum	(AD)1
587	GH0676	G5	Lu R0263	Shandong		Gossypium hirsutum	(AD)1
588	GH0677	G5	Lu R1297	Shandong		Gossypium hirsutum	(AD)1
589	GH0678	G5	Lumian 3892	Shandong		Gossypium hirsutum	(AD)1
590	GH0679	G5	S-1344	Former Soviet Union		Gossypium hirsutum	(AD)1
591	GH0680	G5	Lu 7246	Shandong		Gossypium hirsutum	(AD)1
592	GH0681	G5	Lu 3269	Shandong		Gossypium hirsutum	(AD)1
593	GH0682	G5	Lumian 378	Shandong		Gossypium hirsutum	(AD)1
594	GH0683	G5	Lumian 339	Shandong		Gossypium hirsutum	(AD)1
595	GH0684	G5	Lumianyan 19	Shandong	YER	Gossypium hirsutum	(AD)1
596	GH0685	G5	Lu 8407	Shandong		Gossypium hirsutum	(AD)1
597	GH0686	G5	Lu 7076	Shandong		Gossypium hirsutum	(AD)1
598	GH0687	G5	Lu 31494	Shandong		Gossypium hirsutum	(AD)1
599	GH0688	G5	Lumianyan 37	Shandong	YER	Gossypium hirsutum	(AD)1
600	GH0689	G5	Lumian 319	Shandong		Gossypium hirsutum	(AD)1
601	GH0690	G5	Lu 6269	Shandong		Gossypium hirsutum	(AD)1
602	GH0691	G5	Lu S3232	Shandong	YER	Gossypium hirsutum	(AD)1
603	GH0692	G5	Lu 81013	Shandong		Gossypium hirsutum	(AD)1
604	GH0693	G5	Lu R0061	Shandong		Gossypium hirsutum	(AD)1
605	GH0694	G5	Lu 698	Shandong		Gossypium hirsutum	(AD)1
606	GH0695	G5	Lu 3148	Shandong		Gossypium hirsutum	(AD)1
607	GH0696	G5	Lu 5029	Shandong		Gossypium hirsutum	(AD)1
608	GH0697	G3	Diertao	Beijing		Gossypium hirsutum	(AD)1
609	GH0698	G5	Disantao	Beijing		Gossypium hirsutum	(AD)1
610	GH0699	G5	Zhong Arc-315	Henan		Gossypium hirsutum	(AD)1
611	GH0700	G5	Gui-Nandan-Badi (1)	Guangxi		Gossypium hirsutum	(AD)1
612	GH0701	G5	M-8124-1159 (1)	Uncertain		Gossypium hirsutum	(AD)1
613	GH0702	G3	Tezaoshu	Uncertain		Gossypium hirsutum	(AD)1
614	GH0703	G2	Kensheng 973	Xinjiang		Gossypium hirsutum	(AD)1
615	GH0704	G2	Kensheng 235	Xinjiang		Gossypium hirsutum	(AD)1
616	GH0705	G3	Kuche 130236	Xinjiang		Gossypium hirsutum	(AD)1
617	GH0706	G2	Kuche 140137	Xinjiang		Gossypium hirsutum	(AD)1
618	GH0707	G4	Kuche 140152	Xinjiang		Gossypium hirsutum	(AD)1
619	GH0708	G3	Kuche 150301	Xinjiang		Gossypium hirsutum	(AD)1
620	GH0709	G4	Xinan-Lu	Henan		Gossypium hirsutum	(AD)1
621	GH0710	G5	Gui-Duixu-Lu 1	Guangxi		Gossypium hirsutum	(AD)1
622	GH0711	G2	Gui-Lidang-Lu 1	Guangxi		Gossypium hirsutum	(AD)1
623	GH0712	G1	Gui-Lidang-Lu 5	Guangxi		Gossypium hirsutum	(AD)1
624	GH0713	G5	Gonghe-Lu 1	Qinghai		Gossypium hirsutum	(AD)1
625	GH0714	G3	Fenghuang-Lu 2	Hunan		Gossypium hirsutum	(AD)1
626	GH0715	G5	Gui-Jiazhuan-Lu	Guangxi		Gossypium hirsutum	(AD)1
627	GH0716	G5	Gui-Zhenxiangzhou-Lu	Guangxi		Gossypium hirsutum	(AD)1
628	GH0717	G5	Gui-Tianzhou-Lu	Guangxi		Gossypium hirsutum	(AD)1
629	GH0718	G4	Xinhua-Lu	Hunan		Gossypium hirsutum	(AD)1
630	GH0719	G4	Gui-Tianlin-Lu 2	Guangxi		Gossypium hirsutum	(AD)1
631	GH0720	G5	Dian-Funing-Lu	Yunnan		Gossypium hirsutum	(AD)1
632	GH0721	G5	Dian-Muyang-Lu	Yunnan		Gossypium hirsutum	(AD)1
633	GH0722	G5	Xinxian-Lu	Henan		Gossypium hirsutum	(AD)1
634	GH0723	G5	Gui-Xiadong-Lu	Guangxi		Gossypium hirsutum	(AD)1
635	GH0724	G5	Gui-Bangxu-Lu	Guangxi		Gossypium hirsutum	(AD)1
636	GH0725	G3	Sanbao-Lu	Jiangsu		Gossypium hirsutum	(AD)1
637	GH0726	G5	Qian-Bagu-Lu 2	Guizhou		Gossypium hirsutum	(AD)1
638	GH0727	G5	Qian-Jiaoli-Lu 1	Guizhou		Gossypium hirsutum	(AD)1
639	GH0728	G3	Sandong-Lu 1	Jiangsu		Gossypium hirsutum	(AD)1
640	GH0729	G3	Gui-Yacha-Lu	Guangxi		Gossypium hirsutum	(AD)1
641	GH0730	G3	Guzhang-Lu	Guangxi		Gossypium hirsutum	(AD)1
642	GH0731	G2	Gui-Puhe-Lu-2	Guangxi		Gossypium hirsutum	(AD)1
643	GH0732	G5	Gui-Pingguomian	Guangxi		Gossypium hirsutum	(AD)1
644	GH0733	G5	70-64	Yunnan		Gossypium hirsutum	(AD)1
645	GH0734	G2	Dali 75-8	Yunnan		Gossypium hirsutum	(AD)1
646	GH0735	G3	Dian 373 (Binchuan 373)	Yunnan		Gossypium hirsutum	(AD)1
647	GH0736	G3	Dian-shuangbai-tuoshang	Yunnan		Gossypium hirsutum	(AD)1
648	GH0737	G1	Qian-Pingtang-Tiezi (Fuzzless)	Guizhou		Gossypium hirsutum	(AD)1
649	GH0738	G5	CCRI 3 (2)	Henan	YER	Gossypium hirsutum	(AD)1
650	GH0739	G5	Lumian 1 (1)	Shandong	YER	Gossypium hirsutum	(AD)1
651	GH0740	G3	Xuzhou 209 (2)	Jiangsu	YZR	Gossypium hirsutum	(AD)1
652	GH0741	G5	Shanmian 4 (3)	Shannxi	YER	Gossypium hirsutum	(AD)1
653	GH0742	G5	Xuzhou 142 (1)	Jiangsu	YZR	Gossypium hirsutum	(AD)1
654	GH0743	G4	CCRI 7 (3)	Henan	YER	Gossypium hirsutum	(AD)1
655	GH0744	G3	Shan 401	Shannxi	YER	Gossypium hirsutum	(AD)1
656	GH0745	G5	Shan 1155	Shannxi	YER	Gossypium hirsutum	(AD)1
657	GH0746	G5	57-681 (2)	Sichuan	YZR	Gossypium hirsutum	(AD)1
658	GH0747	G2	CCRI 12 (3)	Henan	YER	Gossypium hirsutum	(AD)1
659	GH0748	G5	52-128 (1)	Sichuan	YZR	Gossypium hirsutum	(AD)1
660	GH0749	G5	Emian 14	Hubei	YZR	Gossypium hirsutum	(AD)1
661	GH0750	G3	Ejing 1 (1)	Hubei	YZR	Gossypium hirsutum	(AD)1
662	GH0751	G5	Yanmian 48	Jiangsu	YZR	Gossypium hirsutum	(AD)1
663	GH0752	G5	CCRI 24	Henan	YER	Gossypium hirsutum	(AD)1
664	GH0753	G5	Jinmian 19	Shanxi	NC	Gossypium hirsutum	(AD)1
665	GH0754	G4	Ekangmian 3	Hubei	YZR	Gossypium hirsutum	(AD)1
666	GH0755	G5	CCRI 10 (1)	Henan	YER	Gossypium hirsutum	(AD)1
667	GH0756	G5	Heishanmian 1 (1)	Liaoning	NC	Gossypium hirsutum	(AD)1
668	GH0757	G5	CCRI 27 (1)	Henan	YER	Gossypium hirsutum	(AD)1
669	GH0758	G5	CCRI 35 (2)	Henan	YER	Gossypium hirsutum	(AD)1
670	GH0759	G5	Wanmian 8	Anhui	YZR	Gossypium hirsutum	(AD)1
671	GH0760	G2	Liaomian 15 (2)	Liaoning	NC	Gossypium hirsutum	(AD)1
672	GH0761	G2	Jinmian 12 (1)	Shanxi	NC	Gossypium hirsutum	(AD)1
673	GH0762	G5	33B (2)	USA		Gossypium hirsutum	(AD)1
674	GH0763	G5	Sumian 12 (2)	Jiangsu	YZR	Gossypium hirsutum	(AD)1
675	GH0764	G5	CCRI 41 (2)	Henan	YER	Gossypium hirsutum	(AD)1
676	GH0765	G4	Ekangmian 9 (1)	Hubei	YZR	Gossypium hirsutum	(AD)1
677	GH0766	G5	CCRI 45 (1)	Henan	YER	Gossypium hirsutum	(AD)1
678	GH0767	G5	Hanmian 802 (1)	Hebei	YER	Gossypium hirsutum	(AD)1
679	GH0768	G5	Lumianyan 21	Shandong	YER	Gossypium hirsutum	(AD)1
680	GH0769	G5	Zhe 905	Zhejiang	YZR	Gossypium hirsutum	(AD)1
681	GH0770	G4	Dongting 1 (1)	Hunan	YZR	Gossypium hirsutum	(AD)1
682	GH0771	G5	Shannongfengkang 6 (1)	Shandong	YER	Gossypium hirsutum	(AD)1
683	GH0772	G5	Jimian 958 (1)	Hebei	YER	Gossypium hirsutum	(AD)1
684	GH0773	G2	Guannong 1 (1)	Liaoning	NC	Gossypium hirsutum	(AD)1
685	GH0774	G5	CCRI 50 (1)	Henan	YER	Gossypium hirsutum	(AD)1
686	GH0775	G2	Zhemian 11 (1)	Zhejiang	YZR	Gossypium hirsutum	(AD)1
687	GH0776	G3	Liaomian 1 (1)	Liaoning	NC	Gossypium hirsutum	(AD)1
688	GH0777	G2	Jinyu 3 (2)	Liaoning	NC	Gossypium hirsutum	(AD)1
689	GH0778	G5	CCRI 44	Henan	YER	Gossypium hirsutum	(AD)1
690	GH0779	G3	Yishuhong (2)	Hubei	YZR	Gossypium hirsutum	(AD)1
691	GH0780	G5	Hanmian 5158	Hebei	YER	Gossypium hirsutum	(AD)1
692	GH0781	G5	Hanmian 885	Hebei	YER	Gossypium hirsutum	(AD)1
693	GH0782	G5	7886	Henan		Gossypium hirsutum	(AD)1
694	GH0783	G5	Lumianyan 27	Shandong	YER	Gossypium hirsutum	(AD)1
695	GH0784	G2	Jinmian 31	Shanxi	NC	Gossypium hirsutum	(AD)1
696	GH0785	G5	Coker 100 (1)	USA		Gossypium hirsutum	(AD)1
697	GH0786	G4	Foster 6 (2)	USA		Gossypium hirsutum	(AD)1
698	GH0787	G4	Stoneville 2B (1)	USA		Gossypium hirsutum	(AD)1
699	GH0788	G4	Trice (3)	USA		Gossypium hirsutum	(AD)1
700	GH0789	G5	McNair 210 (2)	USA		Gossypium hirsutum	(AD)1
701	GH0790	G5	Wuganda 4	Henan		Gossypium hirsutum	(AD)1
702	GH0791	G5	Empire (1)	USA		Gossypium hirsutum	(AD)1
703	GH0792	G2	Delfos 531 (2)	USA		Gossypium hirsutum	(AD)1
704	GH0793	G3	Blanco 3363 (Cluster)	USA		Gossypium hirsutum	(AD)1
705	GH0794	G5	Jisheng 03H16	Hebei		Gossypium hirsutum	(AD)1
706	GH0795	G5	588	Henan		Gossypium hirsutum	(AD)1
707	GH0796	G5	942	Uncertain		Gossypium hirsutum	(AD)1
708	GH0797	G4	664	Uncertain		Gossypium hirsutum	(AD)1
709	GH0798	G4	Kuche 386-5	Xinjiang		Gossypium hirsutum	(AD)1
710	GH0799	G2	Zhonghuzhi PI3911	Xinjiang		Gossypium hirsutum	(AD)1
711	GH0800	G3	Kuche D-2	Xinjiang		Gossypium hirsutum	(AD)1
712	GH0801	G3	Kuche 2T	Xinjiang		Gossypium hirsutum	(AD)1
713	GH0802	G3	Kuche X-2	Xinjiang		Gossypium hirsutum	(AD)1
714	GH0803	G2	Kuitunxi 6	Xinjiang		Gossypium hirsutum	(AD)1
715	GH0804	G2	Kuitunxi 91-2	Xinjiang		Gossypium hirsutum	(AD)1
716	GH0805	G3	Kuche D-1	Xinjiang		Gossypium hirsutum	(AD)1
717	GH0806	G2	Kuche T-22	Xinjiang		Gossypium hirsutum	(AD)1
718	GH0807	G4	Xinyue 1	Xinjiang		Gossypium hirsutum	(AD)1
719	GH0808	G4	Kuche 13X	Xinjiang		Gossypium hirsutum	(AD)1
720	GH0809	G2	Kuitunxi 327	Xinjiang		Gossypium hirsutum	(AD)1
721	GH0810	G4	Kuche 9100A-12	Xinjiang		Gossypium hirsutum	(AD)1
722	GH0811	G3	Kuche M-1	Xinjiang		Gossypium hirsutum	(AD)1
723	GH0812	G5	Kuche 94-103	Xinjiang		Gossypium hirsutum	(AD)1
724	GH0813	G2	Shihezi 895	Xinjiang		Gossypium hirsutum	(AD)1
725	GH0814	G2	Kuitunxi 96-167	Xinjiang		Gossypium hirsutum	(AD)1
726	GH0815	G3	F-3	Xinjiang		Gossypium hirsutum	(AD)1
727	GH0816	G2	Kyrgyzstan 3	Uncertain		Gossypium hirsutum	(AD)1
728	GH0817	G3	Kuche 9100A-11	Xinjiang		Gossypium hirsutum	(AD)1
729	GH0818	G4	Kashi 84247	Xinjiang		Gossypium hirsutum	(AD)1
730	GH0819	G3	Kuche 9100A-4	Xinjiang		Gossypium hirsutum	(AD)1
731	GH0820	G2	Kuitunxi 95-10W	Xinjiang		Gossypium hirsutum	(AD)1
732	GH0821	G2	Kuche 9100A-8	Xinjiang		Gossypium hirsutum	(AD)1
733	GH0822	G2	Kuitunxi 8	Xinjiang		Gossypium hirsutum	(AD)1
734	GH0823	G5	PZ333	Uncertain		Gossypium hirsutum	(AD)1
735	GH0824	G5	Kuitunxi 7W	Xinjiang		Gossypium hirsutum	(AD)1
736	GH0825	G5	Kuitunxi 550	Xinjiang		Gossypium hirsutum	(AD)1
737	GH0826	G3	Kuche 9100A-2	Xinjiang		Gossypium hirsutum	(AD)1
738	GH0827	G3	Kuche 9100A-5	Xinjiang		Gossypium hirsutum	(AD)1
739	GH0828	G2	Kuche 9100A-9	Xinjiang		Gossypium hirsutum	(AD)1
740	GH0829	G3	AH-410	Uncertain		Gossypium hirsutum	(AD)1
741	GH0830	G3	Kuche wuming 6	Xinjiang		Gossypium hirsutum	(AD)1
742	GH0831	G2	Moyu M-20	Xinjiang		Gossypium hirsutum	(AD)1
743	GH0832	G3	Kuche 919han-8	Xinjiang		Gossypium hirsutum	(AD)1
744	GH0833	G3	Shihezi 822	Xinjiang	NWC	Gossypium hirsutum	(AD)1
745	GH0835	G2	Kashi 8526-655	Xinjiang		Gossypium hirsutum	(AD)1
746	GH0836	G2	Kashi 8515	Xinjiang		Gossypium hirsutum	(AD)1
747	GH0837	G2	AH-510	Uncertain		Gossypium hirsutum	(AD)1
748	GH0838	G5	Kuche 919bu-7	Xinjiang		Gossypium hirsutum	(AD)1
749	GH0839	G5	Kashi 76021	Xinjiang		Gossypium hirsutum	(AD)1
750	GH0840	G2	Kuche 9100A-14	Xinjiang		Gossypium hirsutum	(AD)1
751	GH0841	G3	Kuche 919han-10	Xinjiang		Gossypium hirsutum	(AD)1
752	GH0842	G3	Kuche 919han-7	Xinjiang		Gossypium hirsutum	(AD)1
753	GH0843	G3	Kuche 9100A-10	Xinjiang		Gossypium hirsutum	(AD)1
754	GH0844	G5	Moyu H4	Xinjiang		Gossypium hirsutum	(AD)1
755	GH0845	G2	Kuche 919han-2	Xinjiang		Gossypium hirsutum	(AD)1
756	GH0846	G3	Kuche 9100A-6	Xinjiang		Gossypium hirsutum	(AD)1
757	GH0847	G2	Kuitunxi 782	Xinjiang		Gossypium hirsutum	(AD)1
758	GH0848	G3	Kuche 919han-6	Xinjiang		Gossypium hirsutum	(AD)1
759	GH0849	G3	Kuche 919han-4	Xinjiang		Gossypium hirsutum	(AD)1
760	GH0850	G3	AH-бaяyt-2	Former Soviet Union		Gossypium hirsutum	(AD)1
761	GH0851	G2	Kuche 919bu-3	Xinjiang		Gossypium hirsutum	(AD)1
762	GH0852	G5	Xinluzhong 39	Xinjiang	NWC	Gossypium hirsutum	(AD)1
763	GH0853	G3	Kuche 919ye-1	Xinjiang		Gossypium hirsutum	(AD)1
764	GH0854	G2	Kuche 9100A-3	Xinjiang		Gossypium hirsutum	(AD)1
765	GH0855	G3	Kuche 9100A-13	Xinjiang		Gossypium hirsutum	(AD)1
766	GH0856	G2	Shihezi 914	Xinjiang		Gossypium hirsutum	(AD)1
767	GH0857	G4	Kuche 919B-1	Xinjiang		Gossypium hirsutum	(AD)1
768	GH0858	G2	Kuitunxi 97-11	Xinjiang		Gossypium hirsutum	(AD)1
769	GH0859	G4	Huazhong 97-5088	Hubei		Gossypium hirsutum	(AD)1
770	GH0860	G3	Kuche 9100A-16	Xinjiang		Gossypium hirsutum	(AD)1
771	GH0861	G3	Kuche 9100A-7	Xinjiang		Gossypium hirsutum	(AD)1
772	GH0862	G2	Kuche 919bu-1	Xinjiang		Gossypium hirsutum	(AD)1
773	GH0863	G2	Shihezi 1304	Xinjiang	NWC	Gossypium hirsutum	(AD)1
774	GH0864	G5	CCRI 2 (1)	Henan	YER	Gossypium hirsutum	(AD)1
775	GH0865	G5	Zhong 7259	Henan		Gossypium hirsutum	(AD)1
776	GH0866	G5	Anmian 3	Henan	YER	Gossypium hirsutum	(AD)1
777	GH0867	G5	Liuzhuang 1	Henan	YER	Gossypium hirsutum	(AD)1
778	GH0868	G5	Baiquan 260	Henan	YER	Gossypium hirsutum	(AD)1
779	GH0869	G3	Xiangyang 434	Henan	YER	Gossypium hirsutum	(AD)1
780	GH0870	G4	Wanmian 1	Henan	YER	Gossypium hirsutum	(AD)1
781	GH0871	G5	Wanzi 1127	Henan		Gossypium hirsutum	(AD)1
782	GH0872	G5	Wanmian 3	Henan	YER	Gossypium hirsutum	(AD)1
783	GH0873	G5	Shangqiu 17	Henan	YER	Gossypium hirsutum	(AD)1
784	GH0874	G4	Shangqiu 288	Henan	YER	Gossypium hirsutum	(AD)1
785	GH0875	G5	Baiqiang 1	Henan	YER	Gossypium hirsutum	(AD)1
786	GH0876	G4	Dengxianchangrong	Henan	YER	Gossypium hirsutum	(AD)1
787	GH0877	G3	Dengdai 302	Henan	YER	Gossypium hirsutum	(AD)1
788	GH0878	G5	Yankang 7305	Henan	YER	Gossypium hirsutum	(AD)1
789	GH0879	G4	Lumian 4	Shandong	YER	Gossypium hirsutum	(AD)1
790	GH0880	G5	Ziyu 4	Shandong		Gossypium hirsutum	(AD)1
791	GH0881	G5	Danxian 24	Shandong		Gossypium hirsutum	(AD)1
792	GH0882	G4	Chuan 113 (113)	Sichuan	YZR	Gossypium hirsutum	(AD)1
793	GH0883	G5	Changza 1	Sichuan		Gossypium hirsutum	(AD)1
794	GH0884	G4	Damian 3	Sichuan	YZR	Gossypium hirsutum	(AD)1
795	GH0885	G1	Haihuangmian	Sichuan		Gossypium hirsutum	(AD)1
796	GH0886	G4	Jinshangmian	Hunan	YZR	Gossypium hirsutum	(AD)1
797	GH0887	G4	Huamian 2 (Dongting 159)	Hubei	YZR	Gossypium hirsutum	(AD)1
798	GH0888	G5	Huamian 4 (4143)	Hubei	YZR	Gossypium hirsutum	(AD)1
799	GH0889	G5	Huamian 5	Shandong	YER	Gossypium hirsutum	(AD)1
800	GH0890	G5	Hongshi 7	Hubei		Gossypium hirsutum	(AD)1
801	GH0891	G4	Jing mian 4	Hubei	YZR	Gossypium hirsutum	(AD)1
802	GH0892	G5	2116	Hubei		Gossypium hirsutum	(AD)1
803	GH0893	G4	Emian 5 (Dai 3762)	Hubei	YZR	Gossypium hirsutum	(AD)1
804	GH0894	G5	Emian 6 (3268)	Hubei	YZR	Gossypium hirsutum	(AD)1
805	GH0895	G4	Fushe 1	Hubei	YZR	Gossypium hirsutum	(AD)1
806	GH0896	G4	Shamaozhangtao	Hubei		Gossypium hirsutum	(AD)1
807	GH0897	G5	Shanong 6 (2)	Hubei	YZR	Gossypium hirsutum	(AD)1
808	GH0898	G5	Xiaomian 1	Hubei	YZR	Gossypium hirsutum	(AD)1
809	GH0899	G4	Xiaoxian 107	Anhui	YZR	Gossypium hirsutum	(AD)1
810	GH0900	G4	Huanong 413	Anhui	YZR	Gossypium hirsutum	(AD)1
811	GH0901	G4	Ningmian 12 (Dai 6265-8)	Jiangsu	YZR	Gossypium hirsutum	(AD)1
812	GH0902	G5	Ningmian 15 (Dai 37016-6)	Jiangsu	YZR	Gossypium hirsutum	(AD)1
813	GH0903	G5	Nantong 1	Jiangsu	YZR	Gossypium hirsutum	(AD)1
814	GH0904	G4	Nantong 5 (408)	Jiangsu	YZR	Gossypium hirsutum	(AD)1
815	GH0905	G5	Nantong 11	Jiangsu	YZR	Gossypium hirsutum	(AD)1
816	GH0906	G4	Shanghai 1 (Shangmian 1)	Jiangsu	YZR	Gossypium hirsutum	(AD)1
817	GH0907	G4	Baomian 13	Jiangsu	YZR	Gossypium hirsutum	(AD)1
818	GH0908	G4	Simian 1	Jiangsu	YZR	Gossypium hirsutum	(AD)1
819	GH0909	G5	Siyang 6423	Jiangsu		Gossypium hirsutum	(AD)1
820	GH0910	G4	Xinmian 4	Jiangsu	YZR	Gossypium hirsutum	(AD)1
821	GH0911	G5	Zhemian 1	Zhejiang	YZR	Gossypium hirsutum	(AD)1
822	GH0912	G4	Xiezuo 1	Zhejiang	YZR	Gossypium hirsutum	(AD)1
823	GH0913	G4	Xiezuo 2 (1)	Zhejiang	YZR	Gossypium hirsutum	(AD)1
824	GH0914	G5	Mizhemian	Zhejiang		Gossypium hirsutum	(AD)1
825	GH0915	G5	68-30	Zhejiang		Gossypium hirsutum	(AD)1
826	GH0916	G4	Cimian 1	Zhejiang	YZR	Gossypium hirsutum	(AD)1
827	GH0917	G4	Bomian 1	Jiangxi	YZR	Gossypium hirsutum	(AD)1
828	GH0918	G4	Gui-mian 3	Guangxi	YZR	Gossypium hirsutum	(AD)1
829	GH0919	G4	Qian-mian 2	Guizhou	YZR	Gossypium hirsutum	(AD)1
830	GH0920	G4	Yangmadatao	Sichuan	YZR	Gossypium hirsutum	(AD)1
831	GH0921	G2	Yunan 3	Shanxi	NC	Gossypium hirsutum	(AD)1
832	GH0922	G5	Zhexiaomian 1 (71-1833)	Zhejiang	YZR	Gossypium hirsutum	(AD)1
833	GH0923	G5	Dailiaomian	Guizhou	YZR	Gossypium hirsutum	(AD)1
834	GH0924	G4	70-65	Uncertain		Gossypium hirsutum	(AD)1
835	GH0925	G5	Yancheng 651	Jiangsu	YZR	Gossypium hirsutum	(AD)1
836	GH0926	G4	Nantong 76-1885	Jiangsu		Gossypium hirsutum	(AD)1
837	GH0927	G5	1281	Hubei		Gossypium hirsutum	(AD)1
838	GH0928	G4	Xiangyuan 1	Hunan	YZR	Gossypium hirsutum	(AD)1
839	GH0929	G5	Li 76-4039 (Li 4039)	Hunan		Gossypium hirsutum	(AD)1
840	GH0930	G5	Zhong 3474	Henan	YER	Gossypium hirsutum	(AD)1
841	GH0931	G5	Zhong 8010	Henan		Gossypium hirsutum	(AD)1
842	GH0932	G5	Shan 724	Shannxi	YER	Gossypium hirsutum	(AD)1
843	GH0933	G4	Shan 2021	Shannxi	YER	Gossypium hirsutum	(AD)1
844	GH0934	G5	Shan 3563	Shannxi	YER	Gossypium hirsutum	(AD)1
845	GH0935	G5	5245	Shannxi		Gossypium hirsutum	(AD)1
846	GH0936	G5	Beinong 602	Hebei		Gossypium hirsutum	(AD)1
847	GH0937	G4	Jihe 3016 (Jimian 14)	Hebei	YER	Gossypium hirsutum	(AD)1
848	GH0938	G4	Xiang 1-170	Hunan	YZR	Gossypium hirsutum	(AD)1
849	GH0939	G5	Zhong 31	Henan	YER	Gossypium hirsutum	(AD)1
850	GH0940	G5	Zhong 3723	Henan	YER	Gossypium hirsutum	(AD)1
851	GH0941	G5	Yun 82-87	Shanxi	NC	Gossypium hirsutum	(AD)1
852	GH0942	G2	Gangmian 1	Hubei	YZR	Gossypium hirsutum	(AD)1
853	GH0943	G5	Wan 231 (Wanmian 5)	Henan	YER	Gossypium hirsutum	(AD)1
854	GH0944	G5	Chuan 109 (2)	Sichuan	YZR	Gossypium hirsutum	(AD)1
855	GH0945	G5	Pingdu 28	Shandong		Gossypium hirsutum	(AD)1
856	GH0946	G5	Lumian 9 (Lu155)	Shandong	YER	Gossypium hirsutum	(AD)1
857	GH0947	G5	Zhong 99xi	Henan		Gossypium hirsutum	(AD)1
858	GH0948	G5	Mianyang 83-21	Sichuan	YZR	Gossypium hirsutum	(AD)1
859	GH0949	G5	Jimian 15 (Ji zhi 36-3)	Hebei	YER	Gossypium hirsutum	(AD)1
860	GH0950	G5	Beinong-1 (1)	Hebei	YER	Gossypium hirsutum	(AD)1
861	GH0951	G5	Xuzhou 538	Jiangsu		Gossypium hirsutum	(AD)1
862	GH0952	G5	Yumian 3 (Shangqiu 64) (Henan)	Henan	YER	Gossypium hirsutum	(AD)1
863	GH0953	G5	Chuankang 414	Sichuan	YZR	Gossypium hirsutum	(AD)1
864	GH0954	G5	Xiangmian 10 (Kangdai 159)	Hunan	YZR	Gossypium hirsutum	(AD)1
865	GH0955	G4	Huazhong 101 (Huanong 101)	Hubei	YZR	Gossypium hirsutum	(AD)1
866	GH0956	G3	Emian 17 (Xiao 833-18)	Hubei	YZR	Gossypium hirsutum	(AD)1
867	GH0958	G5	Chuanza 1	Sichuan	YZR	Gossypium hirsutum	(AD)1
868	GH0959	G4	Taihu 1087-2A	Jiangsu	YZR	Gossypium hirsutum	(AD)1
869	GH0960	G3	Hu 79-3154	Jiangsu		Gossypium hirsutum	(AD)1
870	GH0961	G5	Sumian 3 (83-811)	Jiangsu	YZR	Gossypium hirsutum	(AD)1
871	GH0962	G4	Ekangmian 2 (sha yang 6062)	Hubei	YZR	Gossypium hirsutum	(AD)1
872	GH0963	G5	Sumian 7 (Nantong 87-1246)	Jiangsu	YZR	Gossypium hirsutum	(AD)1
873	GH0964	G2	Tangmian 1 (113-48)	Hebei	YER	Gossypium hirsutum	(AD)1
874	GH0965	G2	Yumian 14 (Wanzao 654) (Henan)	Henan	YER	Gossypium hirsutum	(AD)1
875	GH0966	G5	Lu 8784	Shandong	YER	Gossypium hirsutum	(AD)1
876	GH0967	G5	Sumian 6 (Yancheng 1015)	Jiangsu	YZR	Gossypium hirsutum	(AD)1
877	GH0968	G5	Sumian 4 (Taicang 87-2)	Jiangsu	YZR	Gossypium hirsutum	(AD)1
878	GH0969	G5	Yumian 10 (Zheng 230) (Henan)	Henan	YER	Gossypium hirsutum	(AD)1
879	GH0970	G5	CCRI 22 (Zhong 1098)	Henan	YER	Gossypium hirsutum	(AD)1
880	GH0971	G5	Zhonghuzhi PI3910	Xinjiang	NWC	Gossypium hirsutum	(AD)1
881	GH0972	G2	Jimian 21 (Han 78-91)	Hebei	YER	Gossypium hirsutum	(AD)1
882	GH0973	G5	Chuan 2802	Sichuan		Gossypium hirsutum	(AD)1
883	GH0974	G5	Emian 7	Hubei	YZR	Gossypium hirsutum	(AD)1
884	GH0975	G2	Xinluzao 9 (1)	Xinjiang	NWC	Gossypium hirsutum	(AD)1
885	GH0976	G5	Yumian 16 (Henan)	Henan	YER	Gossypium hirsutum	(AD)1
886	GH0977	G5	CCRI 32 (1)	Henan	YER	Gossypium hirsutum	(AD)1
887	GH0978	G5	Yumian 15 (Henan)	Henan	YER	Gossypium hirsutum	(AD)1
888	GH0979	G2	Xinluzao 5 (2)	Xinjiang	NWC	Gossypium hirsutum	(AD)1
889	GH0980	G5	Chuanmian 45	Sichuan	YZR	Gossypium hirsutum	(AD)1
890	GH0981	G4	Zhekang 110	Zhejiang	YZR	Gossypium hirsutum	(AD)1
891	GH0982	G5	Annong 121	Anhui	YZR	Gossypium hirsutum	(AD)1
892	GH0983	G5	Dunmian 2 (1)	Gansu	NWC	Gossypium hirsutum	(AD)1
893	GH0984	G5	Jin 496	Liaoning		Gossypium hirsutum	(AD)1
894	GH0985	G4	Dai 10852	Hubei		Gossypium hirsutum	(AD)1
895	GH0986	G4	Emian 3 (2)	Hubei	YZR	Gossypium hirsutum	(AD)1
896	GH0987	G5	Emian 4	Hubei	YZR	Gossypium hirsutum	(AD)1
897	GH0988	G5	Wanmian 703	Anhui		Gossypium hirsutum	(AD)1
898	GH0989	G5	62-200	Sichuan	YZR	Gossypium hirsutum	(AD)1
899	GH0990	G3	71-36	Hubei		Gossypium hirsutum	(AD)1
900	GH0991	G4	Chuan 473A	Sichuan	YZR	Gossypium hirsutum	(AD)1
901	GH0992	G5	Jing 2691	Hubei	YZR	Gossypium hirsutum	(AD)1
902	GH0993	G4	Li 76-47	Hunan		Gossypium hirsutum	(AD)1
903	GH0994	G2	7402	Hubei	YZR	Gossypium hirsutum	(AD)1
904	GH0995	G5	Deltapine 61	USA		Gossypium hirsutum	(AD)1
905	GH0996	G3	Bamian 1 (2)	Sichuan	YZR	Gossypium hirsutum	(AD)1
906	GH0997	G4	Deltapine 27	UAS		Gossypium hirsutum	(AD)1
907	GH0998	G5	Xiangmian 2	Hubei	YZR	Gossypium hirsutum	(AD)1
908	GH0999	G3	Yapengmian (2)	Hubei	YZR	Gossypium hirsutum	(AD)1
909	GH1000	G5	369-10 (Yuelu 2#)	Guangdong	YZR	Gossypium hirsutum	(AD)1
910	GH1001	G5	108bian	Anhui		Gossypium hirsutum	(AD)1
911	GH1002	G3	539	Anhui		Gossypium hirsutum	(AD)1
912	GH1003	G5	485	Anhui		Gossypium hirsutum	(AD)1
913	GH1004	G5	415 (1)	Anhui		Gossypium hirsutum	(AD)1
914	GH1005	G5	F8zhang 9	Anhui		Gossypium hirsutum	(AD)1
915	GH1006	G3	383 kang	Anhui		Gossypium hirsutum	(AD)1
916	GH1007	G3	383 bukang	Anhui		Gossypium hirsutum	(AD)1
917	GH1008	G5	146	Anhui		Gossypium hirsutum	(AD)1
918	GH1009	G3	LE875	Anyang		Gossypium hirsutum	(AD)1
919	GH1010	G3	LE839	Anyang		Gossypium hirsutum	(AD)1
920	GH1011	G5	LE907	Anyang		Gossypium hirsutum	(AD)1
921	GH1012	G5	LE853	Anyang		Gossypium hirsutum	(AD)1
922	GH1013	G5	LE849	Anyang		Gossypium hirsutum	(AD)1
923	GH1014	G5	LE809	Anyang		Gossypium hirsutum	(AD)1
924	GH1015	G5	LE887	Anyang		Gossypium hirsutum	(AD)1
925	GH1016	G5	LE805	Anyang		Gossypium hirsutum	(AD)1
926	GH1017	G5	LE919	Anyang		Gossypium hirsutum	(AD)1
927	GH1018	G5	LE917	Anyang		Gossypium hirsutum	(AD)1
928	GH1019	G5	LE915	Anyang		Gossypium hirsutum	(AD)1
929	GH1020	G5	LE821	Anyang		Gossypium hirsutum	(AD)1
930	GH1021	G5	LE923	Anyang		Gossypium hirsutum	(AD)1
931	GH1022	G5	LE851	Anyang		Gossypium hirsutum	(AD)1
932	GH1023	G5	LE819	Anyang		Gossypium hirsutum	(AD)1
933	GH1024	G3	LE869	Anyang		Gossypium hirsutum	(AD)1
934	GH1025	G5	LE817	Anyang		Gossypium hirsutum	(AD)1
935	GH1026	G5	LE807	Anyang		Gossypium hirsutum	(AD)1
936	GH1027	G5	LE837	Anyang		Gossypium hirsutum	(AD)1
937	GH1028	G5	LE921	Anyang		Gossypium hirsutum	(AD)1
938	GH1029	G5	LE793	Anyang		Gossypium hirsutum	(AD)1
939	GH1030	G5	LE967	Anyang		Gossypium hirsutum	(AD)1
940	GH1031	G5	LE795	Anyang		Gossypium hirsutum	(AD)1
941	GH1032	G5	LE913	Anyang		Gossypium hirsutum	(AD)1
942	GH1033	G5	LE965	Anyang		Gossypium hirsutum	(AD)1
943	GH1034	G3	LE953	Anyang		Gossypium hirsutum	(AD)1
944	GH1035	G3	Kenya 2	Kenya		Gossypium hirsutum	(AD)1
945	GH1036	G5	R014121	Henan		Gossypium hirsutum	(AD)1
946	GH1037	G3	Acala 3080	USA		Gossypium hirsutum	(AD)1
947	GH1038	G3	SA65	Uncertain		Gossypium hirsutum	(AD)1
948	GH1039	G4	Stoneville 2 (1)	USA		Gossypium hirsutum	(AD)1
949	GH1040	G3	Jinnongdayuan 3-5	Shanxi		Gossypium hirsutum	(AD)1
950	GH1041	G3	Han 8904	Hebei	YER	Gossypium hirsutum	(AD)1
951	GH1042	G5	Zhongyuan HAS-1	Henan		Gossypium hirsutum	(AD)1
952	GH1043	G5	Zhongyuan HM1	Henan		Gossypium hirsutum	(AD)1
953	GH1044	G5	Jin 90yuankang 255	Shanxi		Gossypium hirsutum	(AD)1
954	GH1045	G4	E Q1116	Hubei		Gossypium hirsutum	(AD)1
955	GH1046	G5	Yumian 11 (2) (Henan)	Henan	YER	Gossypium hirsutum	(AD)1
956	GH1047	G1	Leyeluoxidamaozi	Guangxi		Gossypium hirsutum	(AD)1
957	GH1048	G2	Taiyuan 02-18	Shanxi		Gossypium hirsutum	(AD)1
958	GH1049	G3	Taiyuan 02-34	Shanxi		Gossypium hirsutum	(AD)1
959	GH1050	G3	Taiyuan 02-37	Shanxi		Gossypium hirsutum	(AD)1
960	GH1051	G3	Taiyuan 02-49	Shanxi		Gossypium hirsutum	(AD)1
961	GH1052	G4	Zhongyihong 9	Beijing		Gossypium hirsutum	(AD)1
962	GH1053	G5	Suyuan 04-5	Jiangsu		Gossypium hirsutum	(AD)1
963	GH1054	G5	Suyuan 04-9	Jiangsu		Gossypium hirsutum	(AD)1
964	GH1055	G4	Suyuan 04-11	Jiangsu		Gossypium hirsutum	(AD)1
965	GH1056	G5	Suyuan 04-12	Jiangsu		Gossypium hirsutum	(AD)1
966	GH1057	G5	Suyuan 04-19	Jiangsu		Gossypium hirsutum	(AD)1
967	GH1058	G5	Suyuan 04-23	Jiangsu		Gossypium hirsutum	(AD)1
968	GH1059	G4	Suyuan 04-24	Jiangsu		Gossypium hirsutum	(AD)1
969	GH1060	G4	Suyuan 04-25	Jiangsu		Gossypium hirsutum	(AD)1
970	GH1061	G5	Suyuan 04-26	Jiangsu		Gossypium hirsutum	(AD)1
971	GH1062	G4	Suyuan 04-27	Jiangsu		Gossypium hirsutum	(AD)1
972	GH1063	G4	Suyuan 04-29	Jiangsu		Gossypium hirsutum	(AD)1
973	GH1064	G4	Suyuan 04-30	Jiangsu		Gossypium hirsutum	(AD)1
974	GH1065	G5	Suyuan 04-40	Jiangsu		Gossypium hirsutum	(AD)1
975	GH1066	G4	Suyuan 04-44	Jiangsu		Gossypium hirsutum	(AD)1
976	GH1067	G5	Suyuan 04-45	Jiangsu		Gossypium hirsutum	(AD)1
977	GH1068	G4	Suyuan 04-46	Jiangsu		Gossypium hirsutum	(AD)1
978	GH1069	G5	Suyuan 04-47	Jiangsu		Gossypium hirsutum	(AD)1
979	GH1070	G5	Suyuan 04-48	Jiangsu		Gossypium hirsutum	(AD)1
980	GH1071	G5	Suyuan 04-50	Jiangsu		Gossypium hirsutum	(AD)1
981	GH1072	G5	Suyuan 04-56	Jiangsu		Gossypium hirsutum	(AD)1
982	GH1073	G4	Suyuan 04-58	Jiangsu		Gossypium hirsutum	(AD)1
983	GH1074	G5	Suyuan 04-59	Jiangsu		Gossypium hirsutum	(AD)1
984	GH1075	G3	Suyuan 04-74	Jiangsu		Gossypium hirsutum	(AD)1
985	GH1076	G4	Suyuan 04-89	Jiangsu		Gossypium hirsutum	(AD)1
986	GH1077	G5	Suyuan 04-110	Jiangsu		Gossypium hirsutum	(AD)1
987	GH1078	G2	Suyuan 04-122	Jiangsu		Gossypium hirsutum	(AD)1
988	GH1079	G4	Suyuan 04-135	Jiangsu		Gossypium hirsutum	(AD)1
989	GH1080	G3	Suyuan 04-157	Jiangsu		Gossypium hirsutum	(AD)1
990	GH1081	G5	Jinmian 27 (Yuan 2918)	Shanxi	NC	Gossypium hirsutum	(AD)1
991	GH1082	G5	C 4727	Former Soviet Union		Gossypium hirsutum	(AD)1
992	GH1083	G3	Bou76	France		Gossypium hirsutum	(AD)1
993	GH1084	G5	CS 7S	Australia		Gossypium hirsutum	(AD)1
994	GH1085	G5	CS 189	Australia		Gossypium hirsutum	(AD)1
995	GH1087	G5	Acala SJ-2	USA		Gossypium hirsutum	(AD)1
996	GH1088	G5	PD0109	USA		Gossypium hirsutum	(AD)1
997	GH1089	G5	PD0111	USA		Gossypium hirsutum	(AD)1
998	GH1090	G5	PD2164	USA		Gossypium hirsutum	(AD)1
999	GH1091	G5	PD4381	USA		Gossypium hirsutum	(AD)1
1000	GH1092	G3	Acala SJC-1	USA		Gossypium hirsutum	(AD)1
1001	GH1093	G5	Tashkent 1(2)	Former Soviet Union (		Gossypium hirsutum	(AD)1
1002	GH1094	G3	L299-10 ("low gossypol")	Uncertain		Gossypium hirsutum	(AD)1
1003	GH1095	G3	ISA BC2 ("low gossypol")	Ivory Coast		Gossypium hirsutum	(AD)1
1004	GH1096	G5	Luwu 403 (Lumian 12)	Shandong	YER	Gossypium hirsutum	(AD)1
1005	GH1097	G5	Hongyemian 2	Sichuan		Gossypium hirsutum	(AD)1
1006	GH1098	G5	Zong 1-61 (1)	Henan		Gossypium hirsutum	(AD)1
1007	GH1099	G3	Delfos 6102	USA		Gossypium hirsutum	(AD)1
1008	GH1100	G2	Pambe	Iran		Gossypium hirsutum	(AD)1
1009	GH1101	G5	F3-6	China		Gossypium hirsutum	(AD)1
1010	GH1102	G2	384	Anhui		Gossypium hirsutum	(AD)1
1011	GH1103	G5	75078-1	Uncertain		Gossypium hirsutum	(AD)1
1012	GH1104	G2	139F	Former Soviet Union		Gossypium hirsutum	(AD)1
1013	GH1105	G5	150F	Former Soviet Union		Gossypium hirsutum	(AD)1
1014	GH1106	G2	Tashkent 3 (1)	Former Soviet Union		Gossypium hirsutum	(AD)1
1015	GH1107	G3	C 6524 (2)	Former Soviet Union		Gossypium hirsutum	(AD)1
1016	GH1108	G4	C 3398	Former Soviet Union		Gossypium hirsutum	(AD)1
1017	GH1109	G4	Local VIR1592-2	Former Soviet Union		Gossypium hirsutum	(AD)1
1018	GH1110	G5	Sakha 3-1	Egypt		Gossypium hirsutum	(AD)1
1019	GH1111	G2	C4 Palermo	Albania		Gossypium hirsutum	(AD)1
1020	GH1112	G2	C5 CV F-856	Albania		Gossypium hirsutum	(AD)1
1021	GH1113	G3	Line CL-26	Former Soviet Union		Gossypium hirsutum	(AD)1
1022	GH1114	G3	L 4933	Uncertain		Gossypium hirsutum	(AD)1
1023	GH1115	G2	289F	Former Soviet Union		Gossypium hirsutum	(AD)1
1024	GH1116	G2	289 F/124	Former Soviet Union		Gossypium hirsutum	(AD)1
1025	GH1117	G3	3p-12	Former Soviet Union		Gossypium hirsutum	(AD)1
1026	GH1118	G3	3p-2	Former Soviet Union		Gossypium hirsutum	(AD)1
1027	GH1119	G2	3p-16	Former Soviet Union		Gossypium hirsutum	(AD)1
1028	GH1120	G2	3p-7	Former Soviet Union		Gossypium hirsutum	(AD)1
1029	GH1121	G2	3p-13	Former Soviet Union		Gossypium hirsutum	(AD)1
1030	GH1122	G3	Allen 333	Uganda		Gossypium hirsutum	(AD)1
1031	GH1123	G4	I 1616/n 181	Mali		Gossypium hirsutum	(AD)1
1032	GH1124	G5	A-333-57	Mali		Gossypium hirsutum	(AD)1
1033	GH1125	G3	NA 2447-9-26-96 HAR 447-9-26-96	Uncertain		Gossypium hirsutum	(AD)1
1034	GH1126	G2	LP(A*)	Uncertain		Gossypium hirsutum	(AD)1
1035	GH1127	G2	SS 6	Uncertain		Gossypium hirsutum	(AD)1
1036	GH1128	G5	Acheo (A)	Italy		Gossypium hirsutum	(AD)1
1037	GH1129	G3	DP 140-5BC (A)	USA		Gossypium hirsutum	(AD)1
1038	GH1130	G3	DP 140-4BC (A)	USA		Gossypium hirsutum	(AD)1
1039	GH1131	G3	Tornado	USA		Gossypium hirsutum	(AD)1
1040	GH1132	G2	C2 8101-73	Albania		Gossypium hirsutum	(AD)1
1041	GH1133	G2	C3 B-432	Albania		Gossypium hirsutum	(AD)1
1042	GH1134	G3	C7 CV NR 21	Albania		Gossypium hirsutum	(AD)1
1043	GH1135	G5	Hybrid Gardabanski 11-10	Uncertain		Gossypium hirsutum	(AD)1
1044	GH1136	G3	124-F	Pakistan		Gossypium hirsutum	(AD)1
1045	GH1137	G5	Kara-chigit	Former Soviet Union		Gossypium hirsutum	(AD)1
1046	GH1138	G2	King Karoyazskiy	Former Soviet Union		Gossypium hirsutum	(AD)1
1047	GH1139	G5	Timopheevii	Mexico		Gossypium hirsutum	(AD)1
1048	GH1140	G5	S-1204	Former Soviet Union		Gossypium hirsutum	(AD)1
1049	GH1141	G3	S-1225	Former Soviet Union		Gossypium hirsutum	(AD)1
1050	GH1142	G5	Deltapine 16 (2)	USA		Gossypium hirsutum	(AD)1
1051	GH1143	G4	Coker 312	USA		Gossypium hirsutum	(AD)1
1052	GH1144	G5	Coker 4104	USA		Gossypium hirsutum	(AD)1
1053	GH1145	G4	Stoneville 4B (2)	USA		Gossypium hirsutum	(AD)1
1054	GH1146	G5	Paymaster	USA		Gossypium hirsutum	(AD)1
1055	GH1147	G2	Paymaster 111	USA		Gossypium hirsutum	(AD)1
1056	GH1148	G5	Paymaster 303	USA		Gossypium hirsutum	(AD)1
1057	GH1149	G3	Lockett 77	USA		Gossypium hirsutum	(AD)1
1058	GH1150	G3	Dixie Triumph (2)	USA		Gossypium hirsutum	(AD)1
1059	GH1151	G5	Trice 2-6	USA		Gossypium hirsutum	(AD)1
1060	GH1152	G5	Mebane (1)	USA		Gossypium hirsutum	(AD)1
1061	GH1153	G5	Carolina Queen	USA		Gossypium hirsutum	(AD)1
1062	GH1154	G3	Lone Star (1)	USA		Gossypium hirsutum	(AD)1
1063	GH1155	G2	McNair 235	USA		Gossypium hirsutum	(AD)1
1064	GH1156	G5	PD6520	USA		Gossypium hirsutum	(AD)1
1065	GH1157	G5	Auburn 634RNR	USA		Gossypium hirsutum	(AD)1
1066	GH1158	G3	SA27 (Fuzzless)	Uncertain		Gossypium hirsutum	(AD)1
1067	GH1159	G3	Lockett 4789	USA		Gossypium hirsutum	(AD)1
1068	GH1160	G4	Trice B15	USA		Gossypium hirsutum	(AD)1
1069	GH1161	G5	Coker 85-119	USA		Gossypium hirsutum	(AD)1
1070	GH1162	G4	Foster (Big ball)	USA		Gossypium hirsutum	(AD)1
1071	GH1163	G5	Gulla	USA		Gossypium hirsutum	(AD)1
1072	GH1164	G5	Trice 2123	USA		Gossypium hirsutum	(AD)1
1073	GH1165	G5	Foster (VW-113-146)	USA		Gossypium hirsutum	(AD)1
1074	GH1166	G5	Delfos 5318	USA		Gossypium hirsutum	(AD)1
1075	GH1167	G5	Delfos 6102-38	USA		Gossypium hirsutum	(AD)1
1076	GH1168	G2	Delfos 252A	USA		Gossypium hirsutum	(AD)1
1077	GH1169	G5	SAENZ PENA 85	Argentina		Gossypium hirsutum	(AD)1
1078	GH1170	G3	Youka 67(17)86	Tanzania		Gossypium hirsutum	(AD)1
1079	GH1171	G4	208H	Pakistan		Gossypium hirsutum	(AD)1
1080	GH1172	G5	Cook C-310-6910	Uncertain		Gossypium hirsutum	(AD)1
1081	GH1173	G4	Chaco 586	Argentina		Gossypium hirsutum	(AD)1
1082	GH1174	G5	Mocovi INTA	Argentina		Gossypium hirsutum	(AD)1
1083	GH1175	G5	Cook NF-806	Uncertain		Gossypium hirsutum	(AD)1
1084	GH1176	G5	EL395	India		Gossypium hirsutum	(AD)1
1085	GH1177	G5	M-100	Pakistan		Gossypium hirsutum	(AD)1
1086	GH1178	G2	MNH-79	Pakistan		Gossypium hirsutum	(AD)1
1087	GH1179	G2	Youka 59/153	Tanzania		Gossypium hirsutum	(AD)1
1088	GH1180	G2	B.P.A.(BPA)	Uganda		Gossypium hirsutum	(AD)1
1089	GH1181	G2	SRIF4-71	France		Gossypium hirsutum	(AD)1
1090	GH1182	G3	IRMA 323	Cameroon		Gossypium hirsutum	(AD)1
1091	GH1183	G3	M-14 (Fuzzy)	India		Gossypium hirsutum	(AD)1
1092	GH1184	G3	HRI70	France		Gossypium hirsutum	(AD)1
1093	GH1185	G3	MS-84	Pakistan		Gossypium hirsutum	(AD)1
1094	GH1186	G3	MCW-5	India		Gossypium hirsutum	(AD)1
1095	GH1187	G5	Sicala 34	Australia		Gossypium hirsutum	(AD)1
1096	GH1188	G5	Siokra	Uncertain		Gossypium hirsutum	(AD)1
1097	GH1189	G5	GL7	France		Gossypium hirsutum	(AD)1
1098	GH1190	G2	NIAB-72	Pakistan		Gossypium hirsutum	(AD)1
1099	GH1191	G5	Brazil 017	Uncertain		Gossypium hirsutum	(AD)1
1100	GH1192	G2	MS-66	Mexico		Gossypium hirsutum	(AD)1
1101	GH1193	G2	Brazil 015	Uncertain		Gossypium hirsutum	(AD)1
1102	GH1194	G3	IHX2	India		Gossypium hirsutum	(AD)1
1103	GH1195	G5	LRA-5163	India		Gossypium hirsutum	(AD)1
1104	GH1196	G2	82166 PC-5	Pakistan		Gossypium hirsutum	(AD)1
1105	GH1197	G2	82174 N-12	Pakistan		Gossypium hirsutum	(AD)1
1106	GH1198	G5	82182 V-2	Pakistan		Gossypium hirsutum	(AD)1
1107	GH1199	G5	82184 PC-20	Pakistan		Gossypium hirsutum	(AD)1
1108	GH1200	G5	82186 PC-16	Pakistan		Gossypium hirsutum	(AD)1
1109	GH1201	G5	Qiuxian 0905	Hebei		Gossypium hirsutum	(AD)1
1110	GH1202	G5	AoBzi 10	Henan		Gossypium hirsutum	(AD)1
1111	GH1203	G5	838	Henan		Gossypium hirsutum	(AD)1
1112	GH1204	G5	SGK971	Henan		Gossypium hirsutum	(AD)1
1113	GH1205	G5	Zhong M411	Henan		Gossypium hirsutum	(AD)1
1114	GH1206	G5	Jizi 5	Hebei		Gossypium hirsutum	(AD)1
1115	GH1207	G5	Jizi 21	Hebei		Gossypium hirsutum	(AD)1
1116	GH1208	G5	Jizi 25	Hebei		Gossypium hirsutum	(AD)1
1117	GH1209	G5	Jizi 30	Hebei		Gossypium hirsutum	(AD)1
1118	GH1210	G5	Jizi 98	Hebei		Gossypium hirsutum	(AD)1
1119	GH1211	G5	Suyuan 0032	Jiangsu		Gossypium hirsutum	(AD)1
1120	GH1212	G5	Suyuan 1006	Jiangsu		Gossypium hirsutum	(AD)1
1121	GH1213	G5	Suyuan 1022	Jiangsu		Gossypium hirsutum	(AD)1
1122	GH1214	G5	Lu 6222	Shandong		Gossypium hirsutum	(AD)1
1123	GH1215	G2	Xianweipinzhi	Chain		Gossypium hirsutum	(AD)1
1124	GH1216	G2	Kensheng 799	Xinjiang		Gossypium hirsutum	(AD)1
1125	GH1217	G2	Kensheng 2815	Xinjiang		Gossypium hirsutum	(AD)1
1126	GH1218	G2	Kensheng 589	Xinjiang		Gossypium hirsutum	(AD)1
1127	GH1219	G3	Kuche 130319/150056	Xinjiang		Gossypium hirsutum	(AD)1
1128	GH1220	G2	Kuche 130237	Xinjiang		Gossypium hirsutum	(AD)1
1129	GH1221	G2	Kuche 130234	Xinjiang		Gossypium hirsutum	(AD)1
1130	GH1222	G3	Kuche 130292	Xinjiang		Gossypium hirsutum	(AD)1
1131	GH1223	G4	Kuche 130288	Xinjiang		Gossypium hirsutum	(AD)1
1132	GH1224	G3	Kuche 140138	Xinjiang		Gossypium hirsutum	(AD)1
1133	GH1225	G2	Kuche 140116	Xinjiang		Gossypium hirsutum	(AD)1
1134	GH1226	G2	Kuche 150403	Xinjiang		Gossypium hirsutum	(AD)1
1135	GH1227	G1	Qian-Libo-Jiarong 7	Guizhou		Gossypium hirsutum	(AD)1
1136	GH1228	G1	Qian-Libo-Yongkang 4	Guizhou		Gossypium hirsutum	(AD)1
1137	GH1229	G4	Qian-Sandu-Jiuqian 2 (2)	Guizhou		Gossypium hirsutum	(AD)1
1138	GH1230	G3	Qian-Rongjiang-Bakai 4 (1)	Guizhou		Gossypium hirsutum	(AD)1
1139	GH1231	G1	Qian-Rongjiang-Pingyang	Guizhou		Gossypium hirsutum	(AD)1
1140	GH1232	G1	Qian-Jianhenanshao-1	Guizhou		Gossypium hirsutum	(AD)1
1141	GH1233	G5	Qian-Liping-Shuikou 1	Guizhou		Gossypium hirsutum	(AD)1
1142	GH1234	G3	Gui-Nandan-Lihu (1)	Guangxi		Gossypium hirsutum	(AD)1
1143	GH1235	G3	Gui-Tiane-Yanlai-1-1-2	Guangxi		Gossypium hirsutum	(AD)1
1144	GH1236	G4	Dian-Matou-Lu 1	Yunnan		Gossypium hirsutum	(AD)1
1145	GH1237	G5	Yue-Taiping-Lu 1	Guangdong		Gossypium hirsutum	(AD)1
1146	GH1238	G5	Yue-Taiping-Lu 3	Guangdong		Gossypium hirsutum	(AD)1
1147	GH1239	G3	Yue-Jiangnan-Lu 1	Guangdong		Gossypium hirsutum	(AD)1
1148	GH1240	G5	Gui-Youping-Lu 1	Guangxi		Gossypium hirsutum	(AD)1
1149	GH1241	G2	Gui-Baise-Lu	Guangxi		Gossypium hirsutum	(AD)1
1150	GH1242	G1	Gui-Longzhou-Lu	Guangxi		Gossypium hirsutum	(AD)1
1151	GH1243	G5	Qian-Puan-Lu-1	Guizhou		Gossypium hirsutum	(AD)1
1152	GH1244	G5	Qian-Xinzhai-Lu 1	Guizhou		Gossypium hirsutum	(AD)1
1153	GH1245	G5	Gui-Nazuo-Lu	Guangxi		Gossypium hirsutum	(AD)1
1154	GH1246	G4	Gui-mian 2	Guangxi	YZR	Gossypium hirsutum	(AD)1
1155	GH1247	G2	70-29-5	Yunnan		Gossypium hirsutum	(AD)1
1156	GH1248	G5	Dali 7317	Yunnan		Gossypium hirsutum	(AD)1
1157	GH1249	G5	Taiwan Guangfu 3	Taiwan		Gossypium hirsutum	(AD)1
1158	GH1250	G4	Qian-mian 3	Guizhou	YZR	Gossypium hirsutum	(AD)1
1159	GH1251	G1	Dian-Muzimian	Yunnan		Gossypium hirsutum	(AD)1
1160	GH1252	G3	Gui-Donglan-Naheng	Guangxi		Gossypium hirsutum	(AD)1
1161	GH1253	G4	Qian-Nashang	Guizhou		Gossypium hirsutum	(AD)1
1162	GH1254	G1	Gui-Sanjiang-Bajiang	Guangxi		Gossypium hirsutum	(AD)1
1163	GH1255	G3	Qian-Sandu-Dayanghua	Guizhou		Gossypium hirsutum	(AD)1
1164	GH1256	G2	Hongzhaidahua	Guizhou		Gossypium hirsutum	(AD)1
1165	GH1257	G5	Gui-Fuchuan	Guangxi		Gossypium hirsutum	(AD)1
1166	GH1258	G5	Gui-Bamaliangda-1	Guangxi		Gossypium hirsutum	(AD)1
1167	GH1259	G3	Gui-Donglan-zhanglan	Guangxi		Gossypium hirsutum	(AD)1
1168	GH1260	G3	Gui-Longlin 1	Guangxi		Gossypium hirsutum	(AD)1
1169	GH1261	G3	Lejidahua (fuzzless)	Guizhou		Gossypium hirsutum	(AD)1
1170	GH1262	G4	CCRI 4 (2)	Henan	YER	Gossypium hirsutum	(AD)1
1171	GH1263	G5	Shiduan 5 (1)	Hebei	YER	Gossypium hirsutum	(AD)1
1172	GH1264	G4	Ejing 92 (1)	Hubei	YZR	Gossypium hirsutum	(AD)1
1173	GH1265	G5	Jimian 1 (1)	Hebei	YER	Gossypium hirsutum	(AD)1
1174	GH1266	G5	Simian 2 (1)	Jiangsu	YZR	Gossypium hirsutum	(AD)1
1175	GH1267	G4	Chuan 73-27	Sichuan	YZR	Gossypium hirsutum	(AD)1
1176	GH1268	G3	Henan 69	Henan	YER	Gossypium hirsutum	(AD)1
1177	GH1269	G3	Jumian 1 (2)	Xinjiang	NWC	Gossypium hirsutum	(AD)1
1178	GH1270	G5	Chuanmian 239	Sichuan	YZR	Gossypium hirsutum	(AD)1
1179	GH1271	G5	Emian 18	Hubei	YZR	Gossypium hirsutum	(AD)1
1180	GH1272	G5	CCRI 16 (1)	Henan	YER	Gossypium hirsutum	(AD)1
1181	GH1273	G4	Stoneville 4 (2)	USA		Gossypium hirsutum	(AD)1
1182	GH1274	G3	Lambright GL-5 (1)	USA		Gossypium hirsutum	(AD)1
1183	GH1391	G5	Qian-Rongjiang-Dongjiang 3	Guizhou		Gossypium hirsutum	(AD)1
1184	GH1396	G5	Qian-Rongjiang-Zhongcheng 6	Guizhou		Gossypium hirsutum	(AD)1
1185	GH1540	G2	Xinluzao 1 (2)	Xinjiang	NWC	Gossypium hirsutum	(AD)1
1186	GH1545	G5	Xinluzao 6	Xinjiang	NWC	Gossypium hirsutum	(AD)1
1187	GH1574	G2	Xinluzao 36 (3)	Xinjiang	NWC	Gossypium hirsutum	(AD)1
1188	GH1578	G2	Xinluzao 40	Xinjiang	NWC	Gossypium hirsutum	(AD)1
1189	GH1580	G2	Xinluzao 42 (2)	Xinjiang	NWC	Gossypium hirsutum	(AD)1
1190	GH1583	G2	Xinluzao 47	Xinjiang	NWC	Gossypium hirsutum	(AD)1
1191	GH1584	G2	Xinluzao 48 (2)	Xinjiang	NWC	Gossypium hirsutum	(AD)1
1192	GH1589	G2	Xinluzao 53	Xinjiang	NWC	Gossypium hirsutum	(AD)1
1193	GH1613	G2	Xinluzhong 1	Xinjiang	NWC	Gossypium hirsutum	(AD)1
1194	GH1614	G4	Xinluzhong 2	Xinjiang	NWC	Gossypium hirsutum	(AD)1
1195	GH1644	G5	Xinluzhong 36	Xinjiang	NWC	Gossypium hirsutum	(AD)1
1196	GH1647	G5	Xinluzhong 40 (2)	Xinjiang	NWC	Gossypium hirsutum	(AD)1
1197	GH1655	G4	Xinluzhong 49	Xinjiang	NWC	Gossypium hirsutum	(AD)1
1198	GH1657	G2	Xinluzhong 51	Xinjiang	NWC	Gossypium hirsutum	(AD)1
1199	GH1662	G5	Xinluzhong 56	Xinjiang	NWC	Gossypium hirsutum	(AD)1
1200	GH1663	G3	Xinluzhong 57	Xinjiang	NWC	Gossypium hirsutum	(AD)1
1201	GH1664	G5	Xinluzhong 58	Xinjiang	NWC	Gossypium hirsutum	(AD)1
1202	GH1665	G5	Xinluzhong 59	Xinjiang	NWC	Gossypium hirsutum	(AD)1
1203	ZGH0347	G4	Yumian 19 (1) (Henan)	Henan	YER	Gossypium hirsutum	(AD)1
1204	ZGH0349	G4	Bao 6716	Hebei		Gossypium hirsutum	(AD)1
1205	ZGH0367	G4	Ganmian 12 (2)	Jiangxi	YZR	Gossypium hirsutum	(AD)1
1206	ZGH0390	G4	PD3246 (2)	USA		Gossypium hirsutum	(AD)1
1207	ZGH0403	G4	Chad 3 (2)	Uncertain		Gossypium hirsutum	(AD)1
1208	ZGH0406	G4	Suyuan 04-162	Jiangsu		Gossypium hirsutum	(AD)1
1209	ZGH0408	G4	Jinmian 2 (3)	Liaoning	NC	Gossypium hirsutum	(AD)1
1210	ZGH0431	G3	Xinluzhong 5 (1)	Xinjiang	NWC	Gossypium hirsutum	(AD)1
1211	ZGH0457	G5	Fergana 175	Former Soviet Union		Gossypium hirsutum	(AD)1
1212	ZGH0465	G5	Emian 12	Hubei	YZR	Gossypium hirsutum	(AD)1
1213	ZGH0489	G5	Jimian 17	Hebei	YER	Gossypium hirsutum	(AD)1
1214	ZGH0493	G5	Ganmian 11	Jiangxi	YZR	Gossypium hirsutum	(AD)1
1215	ZGH0496	G5	Simian 3 (1)	Jiangsu	YZR	Gossypium hirsutum	(AD)1
1216	ZGH0513	G5	CCRI 49 (1)	Henan	YER	Gossypium hirsutum	(AD)1
1217	ZGH0520	G5	Kuitunxi 353	Xinjiang		Gossypium hirsutum	(AD)1
1218	ZGH0542	G3	Xinluzao 28 (1)	Xinjiang	NWC	Gossypium hirsutum	(AD)1
1219	ZGH0544	G5	Yumian 1 (Chongqing)	Chongqing	YZR	Gossypium hirsutum	(AD)1
1220	ZGH0548	G5	Jimian 11 (2)	Hebei	YER	Gossypium hirsutum	(AD)1
1221	ZGH0554	G5	Jimian 8 (2)	Hebei	YER	Gossypium hirsutum	(AD)1
1222	ZGH0564	G5	Emian 20 (1)	Hubei	YZR	Gossypium hirsutum	(AD)1
1223	ZGH0567	G5	Sumian 9	Jiangsu	YZR	Gossypium hirsutum	(AD)1
1224	ZGH0570	G5	Xuzhou 1818 (1)	Jiangsu	YZR	Gossypium hirsutum	(AD)1
1225	ZGH0580	G5	PD6186	USA		Gossypium hirsutum	(AD)1
1226	ZGH0590	G5	Guoxinmian 3 (1)	Hebei	YER	Gossypium hirsutum	(AD)1
1227	ZGH0607	G5	Yinmian 1	Hebei	YER	Gossypium hirsutum	(AD)1
1228	ZGH0608	G5	Xinluzhong 35 (1)	Xinjiang	NWC	Gossypium hirsutum	(AD)1
1229	ZGH0609	G5	Lumianyan 28	Shandong	YER	Gossypium hirsutum	(AD)1
1230	ZGH0613	G5	CCRI 43 (1)	Henan	YER	Gossypium hirsutum	(AD)1
1231	ZGH0627	G5	Brazil 006	Uncertain		Gossypium hirsutum	(AD)1
1232	ZGH0646	G5	Xinyan 96-48	Henan	YER	Gossypium hirsutum	(AD)1
1233	ZGH0652	G5	Changkangmian (1)	Jiangsu	YZR	Gossypium hirsutum	(AD)1
1234	ZGH0670	G5	E sha 28	Hubei	YZR	Gossypium hirsutum	(AD)1
1235	ZGH0678	G5	Xuzhou 514 (1)	Jiangsu	YZR	Gossypium hirsutum	(AD)1
1236	ZGH0688	G2	CF-43/2 (1)	Turkey		Gossypium hirsutum	(AD)1
1237	ZGH0691	G3	Kashi 736	Xinjiang	NWC	Gossypium hirsutum	(AD)1
1238	ZGH0701	G2	Qian-Luodian-Tiezi (1)	Guizhou		Gossypium hirsutum	(AD)1
1239	ZGH0708	G2	Liaomian 9	Liaoning	NC	Gossypium hirsutum	(AD)1
1240	ZGH0709	G2	CCRI 36 (1)	Henan	YER	Gossypium hirsutum	(AD)1
1241	ZGH0713	G2	Xinluzhong 8 (2)	Xinjiang	NWC	Gossypium hirsutum	(AD)1
1242	ZGH0730	G2	Jinyuan 1081	Shanxi		Gossypium hirsutum	(AD)1
1243	ZGH0735	G2	Nonglin 1	Japan		Gossypium hirsutum	(AD)1
1244	ZGH0740	G1	Gui-Nandan-Badi (2)	Guangxi		Gossypium hirsutum	(AD)1
1245	ZGH0751	G2	Xinluzao 7 (3)	Xinjiang	NWC	Gossypium hirsutum	(AD)1
